# Supplementary material for: Insights into the Staphylococcus aureus-Host Interface: Global Changes in Host and Pathogen Gene Expression in a Rabbit Skin Infection Model
Source: PubMed Central journal article supplement (PMC4342162; doi:10.1371/journal.pone.0117713), 2015-02-26
Supplement: pone.0117713.s003.pdf [file pone.0117713.s003.pdf]

Table S1

| probe set mapping | synonym | description                                                 | NCBI COG                                    | p-value  | day one / inoculum |
|-------------------|---------|-------------------------------------------------------------|---------------------------------------------|----------|--------------------|
| SAUSA300_0003     | -       | Hypothetical cytosolic protein                              | Function unknown                            | 4.74E-06 | -3.93              |
| SAUSA300_0004     | recF    | DNA replication and repair protein recF                     | Replication, recombination and repair       | 6.66E-04 | -2.89              |
| SAUSA300_0006     | gyrA    | DNA gyrase subunit A (EC 5.99.1.3)                          | Replication, recombination and repair       | 1.37E-04 | -6.96              |
| SAUSA300_0008     | hutH    | Histidine ammonia-lyase (EC 4.3.1.3)                        | Amino acid transport and metabolism         | 8.32E-07 | 11.92              |
| SAUSA300_0009     | serS    | Seryl-tRNA synthetase (EC 6.1.1.11)                         | Translation                                 | 5.54E-04 | -12.08             |
| SAUSA300_0010     | -       | Branched-chain amino acid transport protein azlC            | Amino acid transport and metabolism         | 2.03E-08 | 9.92               |
| SAUSA300_0015     | rplI    | LSU ribosomal protein L9P                                   | Translation                                 | 2.10E-03 | -2.15              |
| SAUSA300_0016     | dnaB    | Replicative DNA helicase (EC 3.6.1.-)                       | Replication, recombination and repair       | 1.87E-03 | 3.86               |
| SAUSA300_0017     | purA    | Adenylosuccinate synthetase (EC 6.3.4.4)                    | Nucleotide transport and metabolism         | 4.02E-03 | -3.01              |
| SAUSA300_0021     | -       | Two-component sensor kinase yycG (EC 2.7.3.-)               | Signal transduction mechanisms              | 2.02E-07 | -3.95              |
| SAUSA300_0022     | -       | hypothetical membrane protein yycH                          | Function unknown                            | 5.85E-10 | -3.26              |
| SAUSA300_0032     | mecA    | MecA protein                                                | ---                                         | 1.38E-03 | -3.34              |
| SAUSA300_0034     | -       | Transposase                                                 | Replication, recombination and repair       | 6.07E-07 | 20.32              |
| SAUSA300_0035     | -       | Type I restriction-modification system restriction subunit  | ---                                         | 3.08E-06 | -13.45             |
| SAUSA300_0036     | -       | Hypothetical protein                                        | Function unknown                            | 2.10E-14 | 133.34             |
| SAUSA300_0039     | -       | Hypothetical protein                                        | Replication, recombination and repair       | 3.32E-13 | 15.45              |
| SAUSA300_0040     | -       | Hypothetical protein                                        | ---                                         | 8.19E-10 | 14.47              |
| SAUSA300_0044     | -       | Hydroxyacylglutathione hydrolase (EC 3.1.2.6)               | General function prediction only            | 2.62E-14 | 10.75              |
| SAUSA300_0045     | -       | Hypothetical protein                                        | Defense mechanisms/Virulence                | 3.75E-03 | 6.27               |
| SAUSA300_0046     | -       | Hypothetical protein                                        | ---                                         | 2.02E-08 | -2.93              |
| SAUSA300_0047     | -       | Type II restriction-modification system restriction subunit | Defense mechanisms/Virulence                | 3.80E-05 | 8.30               |
| SAUSA300_0049     | -       | Hypothetical protein                                        | ---                                         | 3.55E-07 | 23.86              |
| SAUSA300_0053     | speG    | Spermidine N1-acetyltransferase (EC 2.3.1.57)               | Translation                                 | 3.88E-03 | 2.53               |
| SAUSA300_0056     | -       | Hypothetical protein                                        | Function unknown                            | 1.85E-10 | 18.69              |
| SAUSA300_0057     | -       | Pyridoxal phosphate-dependent enzymes                       | ---                                         | 2.73E-07 | 11.12              |
| SAUSA300_0059     | -       | Hypothetical protein                                        | ---                                         | 9.31E-06 | 56.51              |
| SAUSA300_0062     | arcB    | Ornithine carbamoyltransferase (EC 2.1.3.3)                 | Amino acid transport and metabolism         | 2.22E-03 | 6.36               |
| SAUSA300_0063     | -       | Transcription regulator, crp family                         | Signal transduction mechanisms              | 2.25E-06 | 5.26               |
| SAUSA300_0064     | arcD    | Arginine/ornithine antiporter                               | Amino acid transport and metabolism         | 8.02E-06 | 5.16               |
| SAUSA300_0067     | -       | Putative transcription factors                              | Signal transduction mechanisms              | 1.67E-08 | -3.56              |
| SAUSA300_0068     | -       | Lead, cadmium, zinc and mercury transporting ATPase (E      | Inorganic ion transport and metabolism      | 7.77E-03 | 4.49               |
| SAUSA300_0072     | -       | Hypothetical protein                                        | Coenzyme transport and metabolism           | 8.09E-04 | 9.20               |
| SAUSA300_0073     | -       | Nickel-binding protein                                      | Amino acid transport and metabolism         | 7.95E-07 | 5.49               |
| SAUSA300_0074     | opp-3B  | Hypothetical protein                                        | Amino acid transport and metabolism         | 4.88E-10 | 7.01               |
| SAUSA300_0076     | -       | Hypothetical protein                                        | Amino acid transport and metabolism         | 2.34E-14 | 10.63              |
| SAUSA300_0077     | -       | Nickel transport ATP-binding protein nike                   | Amino acid transport and metabolism         | 3.44E-06 | 15.76              |
| SAUSA300_0078     | copA    | Copper-silver efflux ATPase (EC 3.6.3.-)                    | Inorganic ion transport and metabolism      | 2.51E-08 | -9.41              |
| SAUSA300_0083     | -       | Hypothetical membrane spanning protein                      | ---                                         | 3.30E-12 | 3.30               |
| SAUSA300_0084     | -       | Hypothetical cytosolic protein                              | Function unknown                            | 3.00E-04 | 9.52               |
| SAUSA300_0085     | -       | Rhodanese-related sulfurtransferases / Hypothetical protei  | Function unknown                            | 3.24E-10 | 12.19              |
| SAUSA300_0086     | -       | Hydroxyacylglutathione hydrolase (EC 3.1.2.6)               | General function prediction only            | 3.05E-10 | 10.35              |
| SAUSA300_0092     | -       | Trp repressor binding protein                               | General function prediction only            | 1.03E-02 | 5.39               |
| SAUSA300_0095     | -       | Transcriptional regulators, LysR family                     | Transcription                               | 4.52E-04 | 2.75               |
| SAUSA300_0101     | -       | membrane lipoprotein                                        | ---                                         | 5.42E-05 | 16.43              |
| SAUSA300_0109     | -       | Transporter, drug/metabolite exporter family                | ---                                         | 6.02E-10 | 23.83              |
| SAUSA300_0110     | -       | Transcriptional regulator, GntR family / TYROSINE AMI       | Transcription                               | 9.93E-07 | 2.92               |
| SAUSA300_0111     | -       | Hypothetical protein                                        | ---                                         | 4.51E-08 | -13.20             |
| SAUSA300_0113     | -       | Immunoglobulin G binding protein A precursor                | ---                                         | 4.81E-05 | 3.98               |
| SAUSA300_0115     | sirC    | Staphylobactin transport system permease protein            | Inorganic ion transport and metabolism      | 1.42E-04 | 10.67              |
| SAUSA300_0116     | sirB    | Staphylobactin transport system permease protein            | Inorganic ion transport and metabolism      | 4.32E-13 | 25.94              |
| SAUSA300_0117     | sirA    | Staphylobactin-binding protein                              | ---                                         | 2.78E-09 | 36.21              |
| SAUSA300_0118     | -       | Cysteine synthase (EC 2.5.1.47)                             | Amino acid transport and metabolism         | 6.10E-15 | 124.60             |
| SAUSA300_0119     | -       | Ornithine cyclodeaminase family protein                     | Amino acid transport and metabolism         | 1.62E-17 | 47.62              |
| SAUSA300_0120     | sbnC    | Siderophore biosynthesis lucC protein (EC 6.-.-)            | Secondary metabolites biosynthesis, transpo | 9.93E-11 | 24.32              |
| SAUSA300_0121     | -       | Multi drug resistance efflux pump                           | ---                                         | 9.03E-12 | 40.08              |
| SAUSA300_0122     | -       | Amino-acid citrate synthetase (EC 6.-.-)                    | Secondary metabolites biosynthesis, transpo | 6.14E-09 | 11.84              |
| SAUSA300_0123     | -       | Siderophore synthase (EC 6.-.-)                             | Secondary metabolites biosynthesis, transpo | 1.43E-13 | 13.71              |
| SAUSA300_0124     | -       | 4-hydroxy-2-oxovalerate aldolase (EC 4.1.2.-)               | Carbohydrate transport and metabolism       | 5.21E-08 | 6.60               |
| SAUSA300_0125     | -       | Diaminopimelate decarboxylase (EC 4.1.1.20)                 | Amino acid transport and metabolism         | 1.42E-13 | 25.66              |
| SAUSA300_0126     | -       | Siderophore biosynthesis protein SbnI                       | Transcription                               | 1.95E-11 | 30.10              |
| SAUSA300_0130     | -       | Hypothetical protein                                        | Cell wall/membrane biogenesis               | 5.32E-06 | 16.34              |
| SAUSA300_0131     | -       | Undecaprenyl-phosphate galactosephosphotransferase (EC      | Cell wall/membrane biogenesis               | 4.58E-08 | 9.31               |
| SAUSA300_0132     | -       | beta-D-Glcp alpha-1,6-galactosyltransferase (EC 2.4.1.-)    | Cell wall/membrane biogenesis               | 5.62E-12 | 7.10               |
| SAUSA300_0133     | -       | Secreted polysaccharide polymerase                          | ---                                         | 2.50E-05 | 5.49               |
| SAUSA300_0134     | -       | Transcriptional activator amrA                              | General function prediction only            | 7.58E-04 | 2.57               |
| SAUSA300_0135     | -       | Superoxide dismutase (EC 1.15.1.1)                          | Inorganic ion transport and metabolism      | 1.70E-07 | 24.73              |
| SAUSA300_0137     | -       | Transcriptional regulator, GntR family                      | Transcription                               | 8.51E-03 | -4.67              |
| SAUSA300_0138     | deoD    | Purine nucleoside phosphorylase (EC 2.4.2.1)                | Nucleotide transport and metabolism         | 9.38E-05 | 19.18              |
| SAUSA300_0139     | -       | Permease                                                    | ---                                         | 2.80E-04 | 16.67              |
| SAUSA300_0142     | phnE    | Phosphonates transport system permease protein phnE         | Inorganic ion transport and metabolism      | 2.23E-12 | 10.44              |
| SAUSA300_0143     | phnE    | Phosphonates transport system permease protein phnE         | Inorganic ion transport and metabolism      | 3.73E-06 | 34.99              |
| SAUSA300_0144     | phnC    | Phosphonates transport ATP-binding protein phnC             | Inorganic ion transport and metabolism      | 2.84E-11 | 25.77              |
| SAUSA300_0146     | -       | Hypothetical protein                                        | ---                                         | 2.08E-08 | 6.25               |
| SAUSA300_0151     | adhE    | Alcohol dehydrogenase (EC 1.1.1.1) / Acetaldehyde dehy      | Energy production and conversion            | 8.82E-09 | 9.79               |
| SAUSA300_0152     | cap5A   | Hypothetical protein                                        | Cell wall/membrane biogenesis               | 2.21E-04 | 2.59               |
| SAUSA300_0154     | cap5C   | Phosphotyrosine-protein phosphatase (capsular polysacch     | Carbohydrate transport and metabolism       | 1.06E-07 | 5.61               |
| SAUSA300_0156     | cap5E   | UDP-N-acetylglucosamine 4,6-dehydratase (EC 4.2.1.-)/       | Cell wall/membrane biogenesis               | 9.17E-08 | 33.39              |
| SAUSA300_0157     | cap5F   | UDP-2-acetamido-2,6-dideoxy-beta-L-talose 4-dehydroge       | Cell wall/membrane biogenesis               | 4.67E-08 | 12.83              |

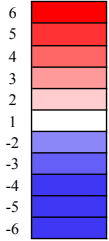

| probe set mapping | synonym | description                                                                                           | NCBI COG                                                     | p-value  | day one / inoculum |
|-------------------|---------|-------------------------------------------------------------------------------------------------------|--------------------------------------------------------------|----------|--------------------|
| SAUSA300_0158     | cap5G   | UDP-2-acetamido-2,6-dideoxy-beta-L-talose 2-epimerase                                                 | Cell wall/membrane biogenesis                                | 1.61E-05 | 12.16              |
| SAUSA300_0159     | cap5H   | O-acetyl transferase (EC 2.3.1.-)                                                                     | General function prediction only                             | 5.51E-06 | 18.66              |
| SAUSA300_0163     | cap5L   | Hypothetical protein                                                                                  | Cell wall/membrane biogenesis                                | 9.44E-03 | 2.98               |
| SAUSA300_0164     | cap5M   | Undecaprenyl-phosphate beta-N-acetyl-D-fucosaminophosphatase                                          | Cell wall/membrane biogenesis                                | 5.28E-03 | 11.84              |
| SAUSA300_0165     | cap5N   | UDP-N-acetyl-D-quinovosamine 4-epimerase (EC 5.1.3.-)                                                 | Cell wall/membrane biogenesis                                | 3.05E-04 | 5.07               |
| SAUSA300_0168     | -       | Hypothetical protein                                                                                  | General function prediction only                             | 9.35E-04 | 4.94               |
| SAUSA300_0169     | -       | Hypothetical membrane spanning protein                                                                | Function unknown                                             | 1.22E-04 | 2.64               |
| SAUSA300_0173     | -       | alpha-helical coiled-coil protein SrpF                                                                | ---                                                          | 5.79E-03 | -2.48              |
| SAUSA300_0179     | -       | NAD-dependent formate dehydrogenase (EC 1.2.1.2)                                                      | Energy production and conversion                             | 4.90E-04 | 3.71               |
| SAUSA300_0184     | argB    | Acetylglutamate kinase (EC 2.7.2.8)                                                                   | Amino acid transport and metabolism                          | 1.08E-08 | 9.04               |
| SAUSA300_0186     | argC    | N-acetyl-gamma-glutamyl-phosphate reductase (EC 1.2.1.1)                                              | Amino acid transport and metabolism                          | 9.04E-08 | 6.46               |
| SAUSA300_0187     | rocD    | Ornithine aminotransferase (EC 2.6.1.13)                                                              | Amino acid transport and metabolism                          | 1.30E-10 | 39.96              |
| SAUSA300_0192     | -       | outer surface protein                                                                                 | Function unknown                                             | 6.93E-10 | -56.15             |
| SAUSA300_0193     | murQ    | Glucokinase regulatory protein                                                                        | General function prediction only                             | 3.92E-14 | -9.64              |
| SAUSA300_0194     | -       | PTS system, sucrose-specific IIBC component (EC 2.7.1.6)                                              | Carbohydrate transport and metabolism                        | 9.97E-10 | -17.50             |
| SAUSA300_0195     | -       | Transcriptional regulator, RpiR family                                                                | Transcription                                                | 1.64E-11 | -16.38             |
| SAUSA300_0197     | -       | Hypothetical cytosolic protein                                                                        | ---                                                          | 3.61E-03 | 2.69               |
| SAUSA300_0200     | -       | Oligopeptide transport ATP-binding protein oppD / Oligopeptide transport system permease protein oppD | General function prediction only                             | 8.58E-07 | 45.61              |
| SAUSA300_0201     | -       | Oligopeptide transport system permease protein oppB                                                   | Amino acid transport and metabolism                          | 2.68E-05 | 9.76               |
| SAUSA300_0203     | -       | Oligopeptide-binding protein oppA                                                                     | Amino acid transport and metabolism                          | 5.61E-06 | 10.16              |
| SAUSA300_0207     | -       | LIPOPROTEIN NLPD/LPPB HOMOLOG                                                                         | Cell wall/membrane biogenesis                                | 2.94E-10 | 26.43              |
| SAUSA300_0208     | -       | Hypothetical protein                                                                                  | Carbohydrate transport and metabolism                        | 1.73E-07 | 7.24               |
| SAUSA300_0209     | -       | Maltose/maltodextrin-binding protein                                                                  | Carbohydrate transport and metabolism                        | 1.61E-11 | 67.64              |
| SAUSA300_0210     | -       | Maltodextrin transport system permease protein malC                                                   | Carbohydrate transport and metabolism                        | 1.20E-04 | 11.66              |
| SAUSA300_0212     | -       | NAD-dependent oxidoreductase                                                                          | General function prediction only                             | 4.11E-06 | 3.61               |
| SAUSA300_0215     | -       | Hypothetical membrane spanning protein                                                                | Function unknown                                             | 2.09E-11 | 29.77              |
| SAUSA300_0223     | -       | Hypothetical protein                                                                                  | ---                                                          | 6.78E-04 | 57.53              |
| SAUSA300_0224     | coa     | Staphylocoagulase precursor                                                                           | ---                                                          | 6.22E-08 | 12.31              |
| SAUSA300_0230     | -       | Hypothetical membrane spanning protein                                                                | Function unknown                                             | 1.83E-06 | 6.15               |
| SAUSA300_0232     | -       | Hypothetical cytosolic protein                                                                        | Function unknown                                             | 1.98E-02 | 2.60               |
| SAUSA300_0233     | -       | Hypothetical protein                                                                                  | ---                                                          | 4.35E-03 | -2.31              |
| SAUSA300_0235     | -       | L-lactate dehydrogenase (EC 1.1.1.27)                                                                 | Energy production and conversion                             | 3.12E-02 | -2.07              |
| SAUSA300_0236     | -       | PTS system, glucose-specific IIBC component (EC 2.7.1.6)                                              | Carbohydrate transport and metabolism                        | 6.65E-11 | 23.45              |
| SAUSA300_0238     | -       | Transcription antiterminator, BglG family / PTS system, non-phosphorylated                            | Transcription                                                | 1.68E-07 | 3.38               |
| SAUSA300_0239     | -       | PTS system, galactitol-specific IIA component (EC 2.7.1.6)                                            | Carbohydrate transport and metabolism                        | 1.51E-04 | 6.51               |
| SAUSA300_0241     | -       | PTS system, galactitol-specific IIC component (EC 2.7.1.6)                                            | Carbohydrate transport and metabolism                        | 3.25E-07 | 8.85               |
| SAUSA300_0242     | gutB    | Sorbitol dehydrogenase (EC 1.1.1.14)                                                                  | Amino acid transport and metabolism                          | 2.90E-03 | 7.79               |
| SAUSA300_0244     | -       | Sorbitol dehydrogenase (EC 1.1.1.14)                                                                  | Amino acid transport and metabolism                          | 1.09E-06 | 2.37               |
| SAUSA300_0251     | -       | CDP-ribitol ribitolphosphotransferase (EC 2.7.8.14)                                                   | Cell wall/membrane biogenesis                                | 3.55E-03 | -2.98              |
| SAUSA300_0253     | scdA    | Nitric oxide-dependent regulator DnrN                                                                 | Cell cycle control, mitosis and meiosis                      | 3.56E-04 | -3.24              |
| SAUSA300_0256     | -       | Murein hydrolase exporter                                                                             | General function prediction only                             | 2.67E-03 | 3.06               |
| SAUSA300_0257     | -       | Murein hydrolase export regulator                                                                     | Cell wall/membrane biogenesis                                | 1.52E-03 | -7.42              |
| SAUSA300_0259     | -       | PTS system, beta-glucoside-specific IIBC component (EC 2.7.1.6)                                       | Carbohydrate transport and metabolism                        | 2.73E-16 | 19.89              |
| SAUSA300_0260     | bglA    | 6-phospho-beta-glucosidase (EC 3.2.1.86)                                                              | Carbohydrate transport and metabolism                        | 1.25E-11 | 8.69               |
| SAUSA300_0261     | -       | Hypothetical protein                                                                                  | Coenzyme transport and metabolism                            | 8.69E-07 | 3.64               |
| SAUSA300_0262     | rbsK    | Ribokinase (EC 2.7.1.15)                                                                              | Carbohydrate transport and metabolism                        | 1.55E-06 | 2.89               |
| SAUSA300_0267     | -       | Transposase                                                                                           | Replication, recombination and repair                        | 3.57E-05 | 35.08              |
| SAUSA300_0268     | -       | Multidrug resistance protein B                                                                        | ---                                                          | 5.93E-13 | 4.87               |
| SAUSA300_0269     | -       | Choloylglycine hydrolase (EC 3.5.1.24)                                                                | Cell wall/membrane biogenesis                                | 1.90E-07 | 23.41              |
| SAUSA300_0270     | lytM    | Peptidoglycan hydrolase                                                                               | General function prediction only                             | 2.06E-08 | 10.63              |
| SAUSA300_0272     | -       | Hypothetical protein                                                                                  | ---                                                          | 1.39E-03 | 7.13               |
| SAUSA300_0273     | -       | Hypothetical protein                                                                                  | ---                                                          | 2.52E-03 | 15.41              |
| SAUSA300_0275     | -       | Hypothetical protein                                                                                  | ---                                                          | 9.44E-06 | 5.26               |
| SAUSA300_0276     | -       | Hypothetical protein                                                                                  | ---                                                          | 5.15E-03 | 13.63              |
| SAUSA300_0277     | -       | Secretory antigen precursor SsaA                                                                      | ---                                                          | 3.22E-06 | 8.66               |
| SAUSA300_0278     | -       | Hypothetical protein                                                                                  | Function unknown                                             | 5.48E-11 | -3.08              |
| SAUSA300_0280     | -       | Hypothetical protein                                                                                  | ---                                                          | 1.27E-04 | 5.71               |
| SAUSA300_0282     | -       | Hypothetical membrane associated protein                                                              | Function unknown                                             | 3.69E-04 | 2.86               |
| SAUSA300_0283     | -       | DNA segregation ATPase and related proteins (FtsK/SpoIIA)                                             | Cell cycle control, mitosis and meiosis                      | 3.06E-02 | 3.12               |
| SAUSA300_0284     | -       | Hypothetical protein                                                                                  | ---                                                          | 3.37E-06 | 10.64              |
| SAUSA300_0286     | -       | Hypothetical protein                                                                                  | ---                                                          | 3.43E-02 | 4.22               |
| SAUSA300_0287     | -       | Hypothetical protein                                                                                  | ---                                                          | 6.00E-03 | 2.05               |
| SAUSA300_0289     | -       | Hypothetical cytosolic protein                                                                        | ---                                                          | 4.10E-03 | -2.01              |
| SAUSA300_0290     | -       | Hypothetical protein                                                                                  | ---                                                          | 1.55E-02 | 11.99              |
| SAUSA300_0292     | -       | Hypothetical protein                                                                                  | ---                                                          | 1.10E-04 | 2.10               |
| SAUSA300_0294     | -       | Hypothetical cytosolic protein                                                                        | ---                                                          | 5.37E-04 | 16.45              |
| SAUSA300_0299     | -       | Hypothetical cytosolic protein                                                                        | ---                                                          | 1.79E-06 | -3.83              |
| SAUSA300_0302     | -       | Hypothetical cytosolic protein                                                                        | ---                                                          | 2.69E-04 | 3.73               |
| SAUSA300_0303     | -       | Hypothetical protein                                                                                  | ---                                                          | 1.51E-04 | 14.58              |
| SAUSA300_0306     | brnQ    | Branched-chain amino acid transport system carrier protein                                            | Amino acid transport and metabolism                          | 5.09E-03 | 8.03               |
| SAUSA300_0307     | -       | Acid phosphatase (EC 3.1.3.2)                                                                         | General function prediction only                             | 9.33E-06 | 17.23              |
| SAUSA300_0308     | -       | ABC transporter permease protein                                                                      | Cell wall/membrane biogenesis                                | 1.22E-10 | -17.95             |
| SAUSA300_0309     | -       | ABC transporter ATP-binding protein                                                                   | Defense mechanisms/Virulence                                 | 2.42E-10 | -2.05              |
| SAUSA300_0310     | pfoR    | Transcriptional regulator pfoR                                                                        | Carbohydrate transport and metabolism                        | 4.58E-03 | 2.62               |
| SAUSA300_0311     | -       | Ribokinase (EC 2.7.1.15)                                                                              | Carbohydrate transport and metabolism                        | 4.02E-11 | 21.02              |
| SAUSA300_0312     | -       | Sugar kinases                                                                                         | Secondary metabolites biosynthesis, transport and catabolism | 2.84E-10 | 4.17               |
| SAUSA300_0313     | -       | Nucleoside permease nupC                                                                              | Nucleotide transport and metabolism                          | 1.17E-08 | 15.98              |
| SAUSA300_0315     | nanA    | N-acetylneuraminatase lyase (EC 4.1.3.3)                                                              | Amino acid transport and metabolism                          | 1.87E-02 | 2.89               |
| SAUSA300_0317     | -       | Transcriptional regulator, RpiR family                                                                | Transcription                                                | 1.80E-03 | 4.28               |
| SAUSA300_0321     | -       | Acetyl esterase (EC 3.1.1.-)                                                                          | Lipid transport and metabolism                               | 1.98E-02 | -2.03              |

| probe set mapping | synonym | description                                               | NCBI COG                                | p-value  | day one / inoculum |
|-------------------|---------|-----------------------------------------------------------|-----------------------------------------|----------|--------------------|
| SAUSA300_0322     | -       | Probable NADH-dependent flavin oxidoreductase yqjG (E     | Energy production and conversion        | 1.47E-08 | 19.65              |
| SAUSA300_0323     | -       | Hypothetical protein                                      | ---                                     | 2.96E-08 | 82.10              |
| SAUSA300_0329     | -       | CPRD14 PROTEIN                                            | Cell wall/membrane biogenesis           | 1.93E-07 | -3.50              |
| SAUSA300_0330     | ulaA    | Putative transport protein sgaT                           | Function unknown                        | 9.21E-14 | 40.38              |
| SAUSA300_0332     | -       | PTS system, mannitol-specific IIA component (EC 2.7.1.6   | Carbohydrate transport and metabolism   | 1.20E-03 | 2.39               |
| SAUSA300_0336     | -       | Hypothetical cytosolic protein                            | Function unknown                        | 1.18E-05 | 9.94               |
| SAUSA300_0340     | -       | FMN reductase (EC 1.5.1.29)                               | General function prediction only        | 3.20E-03 | -11.12             |
| SAUSA300_0342     | -       | Hypothetical protein                                      | ---                                     | 1.73E-04 | 32.14              |
| SAUSA300_0343     | -       | Ribosomal-protein-serine acetyltransferase (EC 2.3.1.-)   | Translation                             | 1.19E-02 | 4.94               |
| SAUSA300_0344     | -       | Lipoprotein                                               | Inorganic ion transport and metabolism  | 4.89E-03 | 3.14               |
| SAUSA300_0345     | -       | Dyp-type peroxidase family protein                        | Inorganic ion transport and metabolism  | 8.40E-11 | 16.12              |
| SAUSA300_0346     | -       | High-affinity iron permease                               | Inorganic ion transport and metabolism  | 2.43E-09 | 2.56               |
| SAUSA300_0348     | -       | Sec-independent protein translocase protein tatA          | Intracellular trafficking and secretion | 3.63E-04 | 3.10               |
| SAUSA300_0350     | -       | Transcriptional regulator, Cro/CI family                  | Transcription                           | 3.84E-04 | 8.28               |
| SAUSA300_0357     | metE    | 5-methyltetrahydropteroyltryglutamate--homocysteine met   | Amino acid transport and metabolism     | 6.50E-05 | 9.61               |
| SAUSA300_0358     | -       | 5-methyltetrahydrofolate--homocysteine methyltransferase  | Amino acid transport and metabolism     | 2.61E-08 | 9.84               |
| SAUSA300_0359     | -       | Cystathionine beta-lyase (EC 4.4.1.8)                     | Amino acid transport and metabolism     | 4.23E-13 | 21.24              |
| SAUSA300_0360     | -       | Cystathionine gamma-synthase (EC 2.5.1.48)                | Amino acid transport and metabolism     | 1.25E-09 | 35.96              |
| SAUSA300_0361     | -       | Chromosome partitioning protein parB                      | Transcription                           | 1.79E-08 | 22.43              |
| SAUSA300_0362     | -       | Mechanosensitive ion channel                              | Cell wall/membrane biogenesis           | 1.01E-02 | 4.41               |
| SAUSA300_0363     | -       | Hypothetical cytosolic protein                            | Function unknown                        | 8.64E-03 | 4.52               |
| SAUSA300_0369     | -       | Hypothetical protein                                      | Defense mechanisms/Virulence            | 2.45E-07 | 16.79              |
| SAUSA300_0370     | -       | Exotoxin                                                  | ---                                     | 1.20E-05 | 9.30               |
| SAUSA300_0371     | -       | Hypothetical protein                                      | Function unknown                        | 1.07E-06 | 70.46              |
| SAUSA300_0372     | -       | Hypothetical exported protein                             | Function unknown                        | 3.39E-08 | -3.13              |
| SAUSA300_0374     | -       | Hypothetical membrane spanning protein                    | ---                                     | 2.59E-10 | -3.46              |
| SAUSA300_0375     | -       | Phosphoglycerate mutase family protein                    | Carbohydrate transport and metabolism   | 1.62E-02 | 5.24               |
| SAUSA300_0376     | -       | Hypothetical membrane spanning protein                    | ---                                     | 6.96E-11 | -2.58              |
| SAUSA300_0378     | -       | Hypothetical protein                                      | ---                                     | 2.02E-08 | -2.18              |
| SAUSA300_0385     | -       | Transcriptional regulator                                 | ---                                     | 1.79E-06 | -2.95              |
| SAUSA300_0386     | xpt     | Xanthine phosphoribosyltransferase (EC 2.4.2.-)           | Nucleotide transport and metabolism     | 1.27E-02 | -2.15              |
| SAUSA300_0387     | pbuX    | Xanthine permease                                         | Nucleotide transport and metabolism     | 4.52E-08 | -10.08             |
| SAUSA300_0388     | guaB    | Inosine-5'-monophosphate dehydrogenase (EC 1.1.1.205)     | Nucleotide transport and metabolism     | 6.86E-07 | -2.33              |
| SAUSA300_0396     | set7    | Exotoxin                                                  | ---                                     | 6.36E-09 | 10.00              |
| SAUSA300_0397     | -       | Exotoxin                                                  | ---                                     | 1.47E-10 | 27.58              |
| SAUSA300_0398     | -       | Exotoxin                                                  | ---                                     | 3.27E-13 | 21.87              |
| SAUSA300_0399     | -       | Exotoxin                                                  | ---                                     | 1.06E-07 | 22.98              |
| SAUSA300_0400     | -       | Hypothetical protein                                      | ---                                     | 1.41E-13 | 148.27             |
| SAUSA300_0401     | -       | Exotoxin                                                  | ---                                     | 1.45E-03 | 7.02               |
| SAUSA300_0402     | -       | Exotoxin                                                  | ---                                     | 7.53E-06 | 5.43               |
| SAUSA300_0403     | -       | Exotoxin                                                  | ---                                     | 3.15E-09 | 23.08              |
| SAUSA300_0404     | -       | Exotoxin                                                  | ---                                     | 6.16E-07 | 49.41              |
| SAUSA300_0407     | -       | Exotoxin                                                  | ---                                     | 2.36E-08 | 67.54              |
| SAUSA300_0408     | -       | Hypothetical cytosolic protein                            | ---                                     | 5.95E-07 | 5.35               |
| SAUSA300_0410     | -       | membrane lipoprotein                                      | ---                                     | 2.10E-09 | 8.28               |
| SAUSA300_0411     | -       | membrane lipoprotein                                      | ---                                     | 1.26E-04 | 5.55               |
| SAUSA300_0413     | -       | membrane lipoprotein                                      | ---                                     | 1.98E-04 | 30.71              |
| SAUSA300_0415     | lpl3    | membrane lipoprotein                                      | ---                                     | 1.94E-03 | 8.43               |
| SAUSA300_0416     | -       | membrane lipoprotein                                      | ---                                     | 1.28E-06 | 15.75              |
| SAUSA300_0417     | -       | membrane lipoprotein                                      | ---                                     | 5.36E-06 | 34.37              |
| SAUSA300_0420     | -       | Hypothetical cytosolic protein                            | ---                                     | 6.99E-08 | -2.99              |
| SAUSA300_0421     | -       | Hypothetical cytosolic protein                            | ---                                     | 1.21E-03 | 7.56               |
| SAUSA300_0427     | -       | Hypothetical cytosolic protein                            | Function unknown                        | 5.80E-04 | -7.58              |
| SAUSA300_0432     | -       | Sodium/neurotransmitter symporter family protein          | General function prediction only        | 1.28E-11 | 23.49              |
| SAUSA300_0433     | cysM    | Cysteine synthase (EC 2.5.1.47)                           | Amino acid transport and metabolism     | 2.96E-07 | 11.04              |
| SAUSA300_0434     | metB    | Cystathionine beta-lyase (EC 4.4.1.8) / Cystathionine gam | Amino acid transport and metabolism     | 3.66E-05 | 3.29               |
| SAUSA300_0435     | -       | ABC transporter ATP-binding protein                       | Inorganic ion transport and metabolism  | 3.47E-02 | 3.60               |
| SAUSA300_0438     | -       | Putative endopeptidase lytE precursor                     | General function prediction only        | 1.09E-08 | -14.18             |
| SAUSA300_0441     | -       | Acetyltransferase (EC 2.3.1.-)                            | General function prediction only        | 1.81E-02 | 3.28               |
| SAUSA300_0442     | -       | Hypothetical membrane spanning protein                    | Function unknown                        | 8.08E-05 | 5.56               |
| SAUSA300_0443     | -       | Hypothetical membrane spanning protein                    | Function unknown                        | 2.42E-02 | 6.37               |
| SAUSA300_0444     | gltC    | Transcriptional regulatory protein gltC                   | Transcription                           | 9.60E-07 | 8.29               |
| SAUSA300_0445     | gltB    | Glutamate synthase [NADPH] large chain (EC 1.4.1.13)      | Amino acid transport and metabolism     | 3.11E-09 | 8.54               |
| SAUSA300_0446     | gltD    | Glutamate synthase [NADPH] small chain (EC 1.4.1.13)      | Amino acid transport and metabolism     | 2.21E-11 | 23.67              |
| SAUSA300_0458     | -       | Arginine decarboxylase (EC 4.1.1.19)                      | Amino acid transport and metabolism     | 8.95E-05 | 2.88               |
| SAUSA300_0459     | tmk     | Thymidylate kinase (EC 2.7.4.9)                           | Nucleotide transport and metabolism     | 2.07E-03 | -3.93              |
| SAUSA300_0461     | holB    | DNA polymerase III, delta' subunit (EC 2.7.7.7)           | Replication, recombination and repair   | 1.67E-08 | -2.50              |
| SAUSA300_0462     | -       | Phosphorelay inhibitor                                    | Function unknown                        | 6.95E-07 | -10.09             |
| SAUSA300_0463     | -       | Initiation-control protein                                | Function unknown                        | 1.39E-05 | -2.99              |
| SAUSA300_0471     | -       | VEG protein                                               | Function unknown                        | 1.14E-03 | -2.24              |
| SAUSA300_0472     | ipk     | 4-diphosphocytidyl-2-C-methyl-D-erythritol kinase (EC 2   | Lipid transport and metabolism          | 5.25E-06 | -5.15              |
| SAUSA300_0474     | -       | Translation initiation inhibitor                          | Translation                             | 1.88E-10 | -5.64              |
| SAUSA300_0475     | -       | Stage V sporulation protein G                             | Cell wall/membrane biogenesis           | 8.25E-15 | -8.31              |
| SAUSA300_0477     | glmU    | Glucosamine-1-phosphate acetyltransferase (EC 2.3.1.157   | Cell wall/membrane biogenesis           | 3.37E-04 | -5.60              |
| SAUSA300_0480     | pth     | Peptidyl-tRNA hydrolase (EC 3.1.1.29)                     | Translation                             | 5.48E-04 | 3.14               |
| SAUSA300_0481     | mfd     | Transcription-repair coupling factor                      | Replication, recombination and repair   | 1.04E-04 | 3.52               |
| SAUSA300_0483     | -       | Hypothetical protein                                      | General function prediction only        | 5.19E-12 | 4.34               |
| SAUSA300_0488     | hpt     | Hypoxanthine-guanine phosphoribosyltransferase (EC 2.4    | Nucleotide transport and metabolism     | 2.72E-02 | -2.64              |
| SAUSA300_0491     | cysK    | Cysteine synthase (EC 2.5.1.47)                           | Amino acid transport and metabolism     | 3.14E-04 | 3.10               |
| SAUSA300_0503     | -       | Transcriptional regulator, GntR family / AMINOTRANSF      | Transcription                           | 8.14E-09 | 6.55               |

| probe set mapping | synonym | description                                               | NCBI COG                               | p-value  | day one / inoculum |
|-------------------|---------|-----------------------------------------------------------|----------------------------------------|----------|--------------------|
| SAUSA300_0505     | -       | pyridoxine biosynthesis amidotransferase (EC 2.4.2.-)     | Coenzyme transport and metabolism      | 1.19E-06 | -6.09              |
| SAUSA300_0508     | -       | CLPC ATPASE                                               | Function unknown                       | 8.89E-05 | 8.62               |
| SAUSA300_0509     | -       | Arginine kinase (EC 2.7.3.3)                              | Amino acid transport and metabolism    | 5.97E-03 | 8.83               |
| SAUSA300_0510     | clpC    | Negative regulator of genetic competence clpC/mecB / Hc   | ---                                    | 1.32E-05 | 5.91               |
| SAUSA300_0514     | cysE    | Serine acetyltransferase (EC 2.3.1.30)                    | Amino acid transport and metabolism    | 1.64E-03 | -2.16              |
| SAUSA300_0515     | cysS    | CysteinyI-tRNA synthetase (EC 6.1.1.16)                   | Translation                            | 7.92E-04 | -2.19              |
| SAUSA300_0516     | -       | Hypothetical protein                                      | Function unknown                       | 1.80E-06 | -4.11              |
| SAUSA300_0519     | -       | RNA polymerase sigma-H factor                             | Transcription                          | 1.59E-06 | -2.60              |
| SAUSA300_0527     | rpoB    | DNA-directed RNA polymerase beta chain (EC 2.7.7.6)       | Transcription                          | 1.26E-10 | -5.32              |
| SAUSA300_0528     | rpoC    | DNA-directed RNA polymerase beta' chain (EC 2.7.7.6)      | Transcription                          | 4.00E-04 | -2.93              |
| SAUSA300_0535     | -       | 2-amino-3-ketobutyrate coenzyme A ligase (EC 2.3.1.29)    | Coenzyme transport and metabolism      | 9.07E-07 | -2.77              |
| SAUSA300_0537     | -       | L-ribulokinase (EC 2.7.1.16)                              | Energy production and conversion       | 4.27E-10 | 5.33               |
| SAUSA300_0539     | ilvE    | Branched-chain amino acid aminotransferase (EC 2.6.1.42)  | Amino acid transport and metabolism    | 4.25E-09 | 3.93               |
| SAUSA300_0542     | -       | Deoxyguanosine kinase (EC 2.7.1.113)                      | Nucleotide transport and metabolism    | 1.43E-06 | -3.47              |
| SAUSA300_0544     | -       | Hydrolase (HAD superfamily)                               | General function prediction only       | 3.14E-03 | 3.43               |
| SAUSA300_0546     | sdrC    | Fibronectin-binding protein                               | ---                                    | 2.10E-10 | 47.36              |
| SAUSA300_0547     | sdrD    | Fibronectin-binding protein                               | ---                                    | 3.08E-07 | 41.39              |
| SAUSA300_0548     | sdrE    | Fibronectin-binding protein                               | ---                                    | 4.76E-07 | 12.04              |
| SAUSA300_0551     | -       | Hypothetical cytosolic protein                            | Function unknown                       | 2.43E-04 | -3.17              |
| SAUSA300_0556     | -       | Hexulose-6-phosphate isomerase (EC 5.-.-.-)               | Cell wall/membrane biogenesis          | 4.46E-13 | -3.04              |
| SAUSA300_0557     | -       | Putative phosphatase                                      | General function prediction only       | 2.97E-10 | 24.83              |
| SAUSA300_0559     | -       | Long-chain-fatty-acid--CoA ligase (EC 6.2.1.3)            | Lipid transport and metabolism         | 1.85E-07 | 15.46              |
| SAUSA300_0560     | vraB    | Acetyl-CoA acetyltransferase (EC 2.3.1.9)                 | Lipid transport and metabolism         | 7.60E-07 | 2.30               |
| SAUSA300_0566     | -       | Arginine permease                                         | Amino acid transport and metabolism    | 8.20E-13 | -11.31             |
| SAUSA300_0568     | -       | Threonine/Serine Exporter                                 | Function unknown                       | 3.13E-08 | -8.31              |
| SAUSA300_0569     | -       | Hypothetical protein                                      | Function unknown                       | 7.81E-03 | 3.31               |
| SAUSA300_0572     | mvk     | Mevalonate kinase (EC 2.7.1.36)                           | Lipid transport and metabolism         | 2.09E-04 | -8.58              |
| SAUSA300_0574     | -       | Phosphomevalonate kinase (EC 2.7.4.2)                     | Lipid transport and metabolism         | 6.35E-10 | -2.84              |
| SAUSA300_0576     | -       | Pyridine nucleotide-disulphide oxidoreductase family prot | Energy production and conversion       | 1.19E-03 | 2.79               |
| SAUSA300_0577     | -       | Rrf2 family protein                                       | Transcription                          | 8.95E-09 | 10.14              |
| SAUSA300_0581     | -       | Hypothetical membrane spanning protein                    | ---                                    | 3.78E-07 | -4.98              |
| SAUSA300_0582     | -       | Hypothetical membrane spanning protein                    | ---                                    | 2.00E-02 | -3.28              |
| SAUSA300_0583     | -       | Hypothetical membrane spanning protein                    | ---                                    | 1.37E-02 | 2.16               |
| SAUSA300_0588     | -       | Hypothetical membrane spanning protein                    | ---                                    | 2.68E-04 | 3.68               |
| SAUSA300_0590     | -       | Trp repressor binding protein                             | General function prediction only       | 4.20E-05 | -2.10              |
| SAUSA300_0596     | argS    | Arginyl-tRNA synthetase (EC 6.1.1.19)                     | Translation                            | 7.43E-07 | -4.28              |
| SAUSA300_0602     | -       | Hypothetical exported protein                             | ---                                    | 2.85E-04 | -4.72              |
| SAUSA300_0603     | -       | Hypothetical protein                                      | ---                                    | 9.04E-07 | -2.81              |
| SAUSA300_0604     | -       | Esterase (EC 3.1.1.-)                                     | General function prediction only       | 6.68E-11 | -2.47              |
| SAUSA300_0607     | -       | Hypothetical protein                                      | ---                                    | 2.48E-06 | 131.62             |
| SAUSA300_0608     | -       | Hypothetical protein                                      | ---                                    | 6.30E-07 | 77.85              |
| SAUSA300_0609     | -       | DNA integration/recombination/inversion protein           | Replication, recombination and repair  | 4.65E-08 | 190.00             |
| SAUSA300_0610     | -       | Sodium/proton antiporter protein shaA                     | Energy production and conversion       | 1.12E-11 | 138.67             |
| SAUSA300_0611     | -       | Sodium/proton antiporter protein shaB                     | Inorganic ion transport and metabolism | 5.80E-11 | 63.78              |
| SAUSA300_0612     | -       | Sodium/proton antiporter protein shaC                     | Inorganic ion transport and metabolism | 2.72E-03 | 7.36               |
| SAUSA300_0613     | -       | Hypothetical protein                                      | Energy production and conversion       | 9.77E-08 | 5.04               |
| SAUSA300_0615     | -       | Sodium/proton antiporter protein shaF                     | Inorganic ion transport and metabolism | 7.53E-05 | 9.58               |
| SAUSA300_0620     | -       | Manganese transport system ATP-binding protein            | Inorganic ion transport and metabolism | 4.55E-03 | -3.08              |
| SAUSA300_0621     | -       | Iron-dependent repressor                                  | Transcription                          | 5.39E-06 | -4.76              |
| SAUSA300_0622     | -       | Hypothetical membrane spanning protein                    | ---                                    | 1.79E-11 | 26.19              |
| SAUSA300_0626     | tagB    | Teichoic acid biosynthesis protein B precursor            | Cell wall/membrane biogenesis          | 1.13E-05 | -3.99              |
| SAUSA300_0627     | tagX    | TAGX                                                      | General function prediction only       | 4.88E-04 | -2.33              |
| SAUSA300_0629     | pbp4    | Hypothetical protein                                      | Cell wall/membrane biogenesis          | 1.95E-02 | 4.94               |
| SAUSA300_0632     | -       | Hypothetical membrane spanning protein                    | Function unknown                       | 1.03E-04 | -4.30              |
| SAUSA300_0634     | fhuB    | Ferrichrome transport system permease protein fhuB        | Inorganic ion transport and metabolism | 3.13E-07 | 2.52               |
| SAUSA300_0638     | -       | Dihydroxyacetone kinase phosphotransfer protein           | Function unknown                       | 2.54E-04 | -2.37              |
| SAUSA300_0643     | -       | Acetyltransferase, GNAT family                            | Translation                            | 1.79E-02 | -5.27              |
| SAUSA300_0646     | -       | Hypothetical protein                                      | Signal transduction mechanisms         | 4.58E-06 | -4.92              |
| SAUSA300_0647     | -       | Bacitracin transport ATP-binding protein ytsC             | Defense mechanisms/Virulence           | 1.55E-04 | 2.07               |
| SAUSA300_0648     | -       | ABC transporter permease protein                          | ---                                    | 3.85E-03 | -2.04              |
| SAUSA300_0650     | -       | Low-affinity inorganic phosphate transporter              | Inorganic ion transport and metabolism | 3.28E-08 | -20.89             |
| SAUSA300_0651     | -       | Secretory antigen precursor SsaA                          | ---                                    | 9.16E-05 | -2.72              |
| SAUSA300_0653     | -       | Transcriptional regulator, AraC family                    | Transcription                          | 5.60E-03 | -2.37              |
| SAUSA300_0664     | -       | Hypothetical protein                                      | ---                                    | 9.53E-11 | -30.96             |
| SAUSA300_0667     | -       | EMG2 protein                                              | Function unknown                       | 3.35E-12 | -3.54              |
| SAUSA300_0673     | -       | Low-affinity zinc transport protein                       | General function prediction only       | 3.50E-05 | -2.46              |
| SAUSA300_0674     | -       | Oxidoreductase (EC 1.1.1.-)                               | General function prediction only       | 5.65E-08 | -3.78              |
| SAUSA300_0675     | -       | Hypothetical protein                                      | ---                                    | 4.75E-06 | -2.71              |
| SAUSA300_0678     | -       | Permease                                                  | Function unknown                       | 2.86E-02 | 3.11               |
| SAUSA300_0680     | norA    | Quinolone resistance protein norA                         | ---                                    | 2.51E-08 | -4.27              |
| SAUSA300_0681     | -       | Hypothetical protein                                      | ---                                    | 2.88E-05 | -3.85              |
| SAUSA300_0682     | ybaK    | Regulatory protein                                        | Function unknown                       | 2.68E-05 | 2.85               |
| SAUSA300_0683     | -       | Fructose repressor                                        | Transcription                          | 4.10E-10 | 13.81              |
| SAUSA300_0684     | fruB    | 1-phosphofructokinase (EC 2.7.1.56)                       | Carbohydrate transport and metabolism  | 5.42E-15 | 11.54              |
| SAUSA300_0685     | fruA    | PTS system, fructose-specific IIBC component (EC 2.7.     | Carbohydrate transport and metabolism  | 3.88E-07 | 8.88               |
| SAUSA300_0687     | -       | Magnesium and cobalt efflux protein corC                  | General function prediction only       | 1.69E-07 | -2.94              |
| SAUSA300_0688     | -       | 2,5-diketo-D-gluconic acid reductase (EC 1.1.1.274)       | General function prediction only       | 1.25E-09 | -9.06              |
| SAUSA300_0689     | -       | Undecaprenyl-phosphate beta-N-acetylglucosaminyltransf    | Cell wall/membrane biogenesis          | 3.21E-14 | -5.67              |
| SAUSA300_0694     | -       | Hypothetical protein                                      | ---                                    | 2.07E-02 | 2.39               |
| SAUSA300_0697     | -       | Queuosine biosynthesis protein QueC                       | General function prediction only       | 1.97E-02 | 11.12              |



| probe set mapping | synonym | description                                               | NCBI COG                                      | p-value  | day one / inoculum |
|-------------------|---------|-----------------------------------------------------------|-----------------------------------------------|----------|--------------------|
| SAUSA300_0698     | pabA    | Anthranilate synthase component II (EC 4.1.3.27) / Para-  | Amino acid transport and metabolism           | 9.46E-04 | 10.99              |
| SAUSA300_0699     | -       | Para-aminobenzoate synthetase component I (EC 6.3.5.8)    | Amino acid transport and metabolism           | 2.18E-03 | 2.11               |
| SAUSA300_0703     | -       | Sulfatase family protein                                  | Cell wall/membrane biogenesis                 | 1.63E-03 | -2.46              |
| SAUSA300_0706     | -       | Glycine betaine transport ATP-binding protein             | Amino acid transport and metabolism           | 8.32E-04 | -2.08              |
| SAUSA300_0710     | -       | Hypothetical protein                                      | ---                                           | 4.27E-10 | 14.69              |
| SAUSA300_0714     | -       | Transporter, drug/metabolite exporter family              | ---                                           | 4.40E-05 | -2.89              |
| SAUSA300_0715     | nrdI    | NrdI protein                                              | Nucleotide transport and metabolism           | 2.80E-06 | -13.55             |
| SAUSA300_0716     | -       | Ribonucleoside-diphosphate reductase alpha chain (EC 1.   | Nucleotide transport and metabolism           | 1.36E-04 | -3.27              |
| SAUSA300_0717     | nrdF    | Ribonucleoside-diphosphate reductase beta chain (EC 1.1   | Nucleotide transport and metabolism           | 1.06E-07 | -21.54             |
| SAUSA300_0718     | -       | Ferric anguibactin transport system permease protein fatD | Inorganic ion transport and metabolism        | 1.23E-11 | 3.09               |
| SAUSA300_0719     | -       | Ferric anguibactin transport system permease protein fatC | Inorganic ion transport and metabolism        | 8.90E-03 | 3.98               |
| SAUSA300_0720     | -       | Ferric anguibactin transport ATP-binding protein          | Inorganic ion transport and metabolism        | 1.43E-07 | 16.72              |
| SAUSA300_0721     | -       | Ferric anguibactin-binding protein                        | Inorganic ion transport and metabolism        | 9.18E-07 | 21.22              |
| SAUSA300_0723     | -       | Glutamate-rich protein grpB                               | ---                                           | 2.64E-07 | 2.39               |
| SAUSA300_0725     | -       | Hypothetical cytosolic protein                            | ---                                           | 3.10E-07 | -5.13              |
| SAUSA300_0726     | -       | Glycerate kinase (EC 2.7.1.31)                            | Carbohydrate transport and metabolism         | 1.55E-02 | -2.27              |
| SAUSA300_0729     | -       | Threonine/Serine Exporter                                 | Function unknown                              | 3.56E-04 | 2.17               |
| SAUSA300_0731     | -       | Undecaprenyl-phosphate alpha-N-acetylglucosaminephos      | Cell wall/membrane biogenesis                 | 8.27E-06 | 3.83               |
| SAUSA300_0732     | -       | Hypothetical protein                                      | Function unknown                              | 4.95E-03 | 3.21               |
| SAUSA300_0734     | -       | COMF operon protein 1                                     | Replication, recombination and repair         | 9.88E-10 | 25.76              |
| SAUSA300_0735     | -       | COMF operon protein 3                                     | ---                                           | 7.34E-03 | 2.96               |
| SAUSA300_0739     | -       | Secretory antigen precursor SsaA                          | General function prediction only              | 1.65E-09 | 18.73              |
| SAUSA300_0741     | uvrB    | Excinuclease ABC subunit B                                | Replication, recombination and repair         | 8.76E-06 | -2.77              |
| SAUSA300_0743     | hprK    | HPR(SER) KINASE (EC 2.7.1.-) / PHOSPHATASE (EC            | Signal transduction mechanisms                | 1.07E-08 | -6.13              |
| SAUSA300_0744     | lgt     | Prolipoprotein diacylglyceryl transferase (EC 2.4.99.-)   | Cell wall/membrane biogenesis                 | 2.63E-07 | -2.53              |
| SAUSA300_0745     | -       | O-acetyltransferase (EC 2.3.1.-)                          | General function prediction only              | 5.95E-05 | -2.56              |
| SAUSA300_0746     | -       | Tetratricopeptide repeat family protein                   | General function prediction only              | 6.72E-04 | -2.48              |
| SAUSA300_0747     | trxB    | Thioredoxin reductase (EC 1.8.1.9)                        | Posttranslational modification, protein turno | 2.80E-02 | 2.24               |
| SAUSA300_0749     | -       | Hypothetical membrane associated protein                  | Function unknown                              | 7.87E-09 | -6.96              |
| SAUSA300_0750     | -       | Hypothetical cytosolic protein                            | Function unknown                              | 2.82E-11 | -2.64              |
| SAUSA300_0753     | -       | Cell division inhibitor                                   | General function prediction only              | 1.99E-07 | -3.99              |
| SAUSA300_0754     | -       | Hypothetical protein                                      | ---                                           | 1.24E-08 | -2.19              |
| SAUSA300_0757     | pgk     | Phosphoglycerate kinase (EC 2.7.2.3)                      | Carbohydrate transport and metabolism         | 1.24E-05 | -2.37              |
| SAUSA300_0758     | tpiA    | Triosephosphate isomerase (EC 5.3.1.1)                    | Carbohydrate transport and metabolism         | 3.62E-04 | -2.12              |
| SAUSA300_0759     | gpml    | Phosphoglycerate mutase (EC 5.4.2.1)                      | Carbohydrate transport and metabolism         | 3.26E-09 | -2.07              |
| SAUSA300_0760     | eno     | Enolase (EC 4.2.1.11)                                     | Carbohydrate transport and metabolism         | 2.13E-03 | -2.31              |
| SAUSA300_0761     | -       | Hypothetical membrane spanning protein                    | ---                                           | 1.76E-06 | -3.45              |
| SAUSA300_0762     | secG    | Protein translocase subunit secG                          | Intracellular trafficking and secretion       | 3.26E-04 | -2.17              |
| SAUSA300_0765     | smpB    | SsrA-binding protein                                      | Posttranslational modification, protein turno | 1.63E-09 | -2.04              |
| SAUSA300_0767     | -       | Hypothetical protein                                      | ---                                           | 6.91E-03 | 2.86               |
| SAUSA300_0768     | -       | Hypothetical protein                                      | ---                                           | 2.79E-03 | -2.42              |
| SAUSA300_0771     | -       | Acetyltransferase (EC 2.3.1.-)                            | General function prediction only              | 1.48E-04 | -6.87              |
| SAUSA300_0772     | clfA    | Fibronectin-binding protein                               | ---                                           | 7.92E-16 | -6.52              |
| SAUSA300_0773     | -       | Staphylocoagulase precursor                               | ---                                           | 4.63E-06 | 34.52              |
| SAUSA300_0774     | empbp   | Extracellular matrix binding protein / Fibrinogen-binding | ---                                           | 3.36E-07 | 11.71              |
| SAUSA300_0775     | -       | extracellular matrix and plasma binding protein           | ---                                           | 9.40E-09 | 20.72              |
| SAUSA300_0777     | -       | Cold shock protein                                        | Transcription                                 | 1.37E-10 | -22.62             |
| SAUSA300_0778     | -       | Hypothetical protein                                      | ---                                           | 2.41E-03 | -2.09              |
| SAUSA300_0779     | -       | Phage protein                                             | ---                                           | 3.87E-05 | -2.17              |
| SAUSA300_0780     | -       | Hypothetical exported protein                             | Function unknown                              | 4.00E-04 | 2.38               |
| SAUSA300_0783     | -       | Phosphoglycerate mutase family protein                    | Carbohydrate transport and metabolism         | 6.88E-05 | 5.85               |
| SAUSA300_0786     | -       | Organic hydroperoxide resistance protein                  | Posttranslational modification, protein turno | 6.48E-11 | -61.85             |
| SAUSA300_0787     | aroD    | 3-dehydroquinate dehydratase (EC 4.2.1.10)                | Amino acid transport and metabolism           | 3.57E-02 | 13.01              |
| SAUSA300_0788     | -       | Nitroreductase family                                     | Energy production and conversion              | 4.52E-04 | 2.81               |
| SAUSA300_0792     | -       | Hypothetical protein                                      | ---                                           | 2.28E-02 | 8.52               |
| SAUSA300_0794     | -       | DNA primase (bacterial type) and small primase-like prote | Replication, recombination and repair         | 7.21E-07 | -9.72              |
| SAUSA300_0796     | -       | ABC transporter ATP-binding protein                       | Inorganic ion transport and metabolism        | 1.74E-06 | 8.63               |
| SAUSA300_0797     | -       | ABC transporter permease protein                          | Inorganic ion transport and metabolism        | 2.86E-04 | 2.60               |
| SAUSA300_0799     | int     | DNA integration/recombination/inversion protein           | Replication, recombination and repair         | 2.76E-06 | 13.11              |
| SAUSA300_0800     | sek     | Enterotoxin                                               | ---                                           | 5.62E-03 | -2.57              |
| SAUSA300_0802     | -       | Zn-dependent alcohol dehydrogenases and related dehydr    | ---                                           | 5.93E-04 | -2.80              |
| SAUSA300_0804     | -       | Transcriptional regulator, Cro family                     | ---                                           | 1.00E-03 | 3.89               |
| SAUSA300_0809     | -       | DNA primase                                               | General function prediction only              | 1.02E-02 | 3.58               |
| SAUSA300_0811     | -       | Hypothetical protein                                      | ---                                           | 1.39E-02 | 3.10               |
| SAUSA300_0813     | -       | Hypothetical protein                                      | ---                                           | 2.94E-04 | 2.46               |
| SAUSA300_0815     | ear     | Hypothetical protein                                      | ---                                           | 3.47E-07 | 7.26               |
| SAUSA300_0817     | -       | Integral membrane protein                                 | Function unknown                              | 2.68E-06 | -2.16              |
| SAUSA300_0819     | sufD    | SufD protein                                              | Posttranslational modification, protein turno | 8.21E-08 | -4.32              |
| SAUSA300_0826     | -       | Hypothetical cytosolic protein                            | Function unknown                              | 1.47E-02 | -2.70              |
| SAUSA300_0828     | -       | 5'-nucleotidase (EC 3.1.3.5)                              | Nucleotide transport and metabolism           | 6.17E-04 | -4.16              |
| SAUSA300_0832     | -       | Hypothetical cytosolic protein                            | Function unknown                              | 3.44E-06 | -3.67              |
| SAUSA300_0833     | -       | Hydrolase (HAD superfamily)                               | Carbohydrate transport and metabolism         | 4.15E-06 | -2.33              |
| SAUSA300_0834     | -       | Glyoxylate reductase (NADP+) (EC 1.1.1.79) / Glyoxylate   | Energy production and conversion              | 1.84E-06 | -5.90              |
| SAUSA300_0836     | dlbB    | Protein dlbB                                              | Cell wall/membrane biogenesis                 | 1.25E-04 | -3.21              |
| SAUSA300_0839     | -       | NiFU-like protein                                         | Posttranslational modification, protein turno | 2.11E-02 | 3.09               |
| SAUSA300_0840     | -       | Hypothetical protein                                      | Function unknown                              | 2.06E-02 | 2.57               |
| SAUSA300_0844     | -       | NADH dehydrogenase family                                 | Energy production and conversion              | 5.64E-08 | -2.96              |
| SAUSA300_0848     | -       | Thioredoxin reductase/alkyl hydroperoxide reductase       | Energy production and conversion              | 2.64E-07 | 93.90              |
| SAUSA300_0849     | mhg     | Sodium/proton antiporter protein shaG                     | Inorganic ion transport and metabolism        | 1.87E-02 | -2.41              |
| SAUSA300_0850     | mhf     | Sodium/proton antiporter protein shaF                     | Inorganic ion transport and metabolism        | 8.63E-03 | 2.31               |

| probe set mapping | synonym | description                                                                         | NCBI COG                                         | p-value  | day one / inoculum |
|-------------------|---------|-------------------------------------------------------------------------------------|--------------------------------------------------|----------|--------------------|
| SAUSA300_0858     | -       | S1-type RNA-binding domain                                                          | Translation                                      | 4.02E-09 | -5.32              |
| SAUSA300_0860     | rocD    | Ornithine aminotransferase (EC 2.6.1.13)                                            | Amino acid transport and metabolism              | 5.40E-12 | -2.83              |
| SAUSA300_0861     | gudB    | NAD-specific glutamate dehydrogenase (EC 1.4.1.2)                                   | Amino acid transport and metabolism              | 1.96E-07 | -3.16              |
| SAUSA300_0862     | glpQ    | Glycerophosphoryl diester phosphodiesterase (EC 3.1.4.4)                            | Energy production and conversion                 | 2.13E-03 | 2.11               |
| SAUSA300_0863     | argH    | Argininosuccinate lyase (EC 4.3.2.1)                                                | Amino acid transport and metabolism              | 6.01E-11 | 12.69              |
| SAUSA300_0864     | argG    | Argininosuccinate synthase (EC 6.3.4.5)                                             | Amino acid transport and metabolism              | 1.08E-11 | 10.93              |
| SAUSA300_0872     | -       | Hypothetical protein                                                                | ---                                              | 1.08E-09 | -2.05              |
| SAUSA300_0874     | -       | Hydrolase (HAD superfamily)                                                         | General function prediction only                 | 2.77E-05 | -4.41              |
| SAUSA300_0876     | -       | Acyltransferase family                                                              | Lipid transport and metabolism                   | 1.23E-04 | 3.08               |
| SAUSA300_0877     | clpB    | ClpB protein                                                                        | Posttranslational modification, protein turnover | 7.84E-06 | 13.16              |
| SAUSA300_0878     | -       | Citrate synthase I repressor                                                        | Transcription                                    | 2.13E-05 | 33.31              |
| SAUSA300_0879     | -       | 2-isopropylmalate synthase (EC 2.3.3.13)                                            | Amino acid transport and metabolism              | 2.16E-11 | 16.33              |
| SAUSA300_0880     | -       | SUA5 protein                                                                        | Translation                                      | 6.16E-08 | 36.90              |
| SAUSA300_0881     | -       | Major Facilitator Superfamily                                                       | ---                                              | 9.23E-03 | 5.79               |
| SAUSA300_0882     | -       | Putative phosphatidylethanolamine-binding protein                                   | General function prediction only                 | 3.13E-07 | 3.01               |
| SAUSA300_0883     | -       | Outer membrane protein                                                              | ---                                              | 6.18E-09 | -2.79              |
| SAUSA300_0885     | fabH    | 3-oxoacyl-[acyl-carrier-protein] synthase III (EC 2.3.1.41)                         | Lipid transport and metabolism                   | 1.02E-08 | 4.92               |
| SAUSA300_0887     | oppB    | Oligopeptide transport system permease protein oppB                                 | Amino acid transport and metabolism              | 5.51E-09 | -9.30              |
| SAUSA300_0890     | oppF    | Oligopeptide transport ATP-binding protein oppF                                     | General function prediction only                 | 4.68E-06 | -3.50              |
| SAUSA300_0891     | oppA    | Oligopeptide-binding protein oppA                                                   | Amino acid transport and metabolism              | 3.10E-08 | -4.85              |
| SAUSA300_0892     | oppA    | Oligopeptide-binding protein oppA                                                   | Amino acid transport and metabolism              | 3.97E-10 | 86.20              |
| SAUSA300_0893     | oppF    | Oligopeptide transport ATP-binding protein oppD                                     | Amino acid transport and metabolism              | 7.16E-07 | 29.61              |
| SAUSA300_0894     | oppD    | Oligopeptide transport ATP-binding protein oppF                                     | Amino acid transport and metabolism              | 5.17E-06 | 28.79              |
| SAUSA300_0896     | oppC    | Oligopeptide transport system permease protein oppC                                 | Amino acid transport and metabolism              | 4.03E-08 | 4.53               |
| SAUSA300_0897     | trpS    | Tryptophanyl-tRNA synthetase (EC 6.1.1.2)                                           | Translation                                      | 8.21E-03 | 3.09               |
| SAUSA300_0900     | -       | Putative competence protein/transcription factor                                    | General function prediction only                 | 5.02E-13 | 61.81              |
| SAUSA300_0901     | -       | Putative competence protein/transcription factor                                    | General function prediction only                 | 1.69E-08 | 37.56              |
| SAUSA300_0902     | pepF    | Oligoendopeptidase F (EC 3.4.24.-)                                                  | Amino acid transport and metabolism              | 5.01E-04 | 3.56               |
| SAUSA300_0903     | -       | Hypothetical cytosolic protein                                                      | Secondary metabolites biosynthesis, transport    | 1.12E-06 | -2.08              |
| SAUSA300_0907     | -       | GTP pyrophosphokinase homolog                                                       | Function unknown                                 | 1.82E-02 | 2.93               |
| SAUSA300_0909     | -       | Ribosomal large subunit pseudouridine synthase D (EC 4.1.13.1)                      | Translation                                      | 2.39E-04 | -2.45              |
| SAUSA300_0914     | -       | Sodium/proton-dependent alanine carrier protein                                     | Amino acid transport and metabolism              | 2.08E-09 | 3.84               |
| SAUSA300_0916     | -       | 2'-5' RNA ligase (EC 6.5.1.-)                                                       | Translation                                      | 6.77E-08 | -2.12              |
| SAUSA300_0918     | -       | 1,2-diacylglycerol 3-glucosyltransferase (EC 2.4.1.157) / glucosyltransferase       | Cell wall/membrane biogenesis                    | 1.29E-03 | -3.02              |
| SAUSA300_0920     | -       | Hypothetical protein                                                                | ---                                              | 1.94E-05 | -4.31              |
| SAUSA300_0922     | -       | Tellurite resistance protein terC                                                   | Inorganic ion transport and metabolism           | 1.76E-06 | 6.72               |
| SAUSA300_0923     | htrA    | Endopeptidase degP (EC 3.4.21.-)                                                    | Posttranslational modification, protein turnover | 3.92E-11 | 3.04               |
| SAUSA300_0924     | -       | Potassium uptake protein ktrB                                                       | Inorganic ion transport and metabolism           | 5.65E-03 | 4.82               |
| SAUSA300_0930     | -       | Lipoate-protein ligase A (EC 6.3.2.-)                                               | Coenzyme transport and metabolism                | 1.50E-04 | 9.83               |
| SAUSA300_0934     | -       | Hypothetical protein                                                                | Function unknown                                 | 6.65E-09 | 15.88              |
| SAUSA300_0936     | -       | ABC transporter ATP-binding protein                                                 | Defense mechanisms/Virulence                     | 1.48E-09 | 23.88              |
| SAUSA300_0941     | -       | Iron(III) dicitrate-binding protein                                                 | Inorganic ion transport and metabolism           | 6.99E-04 | 9.88               |
| SAUSA300_0942     | -       | Hypothetical membrane spanning protein                                              | Function unknown                                 | 1.51E-07 | 4.61               |
| SAUSA300_0944     | menA    | 1,4-dihydroxy-2-naphthoate polyprenyltransferase (EC 2.3.1.24)                      | Coenzyme transport and metabolism                | 1.74E-04 | 2.39               |
| SAUSA300_0947     | -       | Menaquinone biosynthesis related protein                                            | General function prediction only                 | 1.14E-02 | -3.12              |
| SAUSA300_0950     | sspB    | Staphopain (EC 3.4.22.-)                                                            | ---                                              | 1.13E-06 | -5.80              |
| SAUSA300_0952     | -       | Aromatic amino acid aminotransferase (EC 2.6.1.57) / Acetyltransferase, GNAT family | Amino acid transport and metabolism              | 5.13E-10 | 2.17               |
| SAUSA300_0956     | -       | Acetyltransferase, GNAT family                                                      | General function prediction only                 | 5.47E-08 | 12.70              |
| SAUSA300_0959     | fnt     | Beta-lactamase family protein                                                       | Defense mechanisms/Virulence                     | 2.01E-02 | 11.71              |
| SAUSA300_0960     | qoxD    | Cytochrome aa3 quinol oxidase polypeptide IV (EC 1.9.3.1)                           | Energy production and conversion                 | 6.88E-07 | -13.20             |
| SAUSA300_0961     | qoxC    | Cytochrome aa3 quinol oxidase polypeptide III (EC 1.9.3.1)                          | Energy production and conversion                 | 1.25E-06 | -3.12              |
| SAUSA300_0962     | qoxB    | Cytochrome aa3 quinol oxidase polypeptide I (EC 1.9.3.1)                            | Energy production and conversion                 | 9.22E-11 | -2.49              |
| SAUSA300_0963     | qoxA    | Cytochrome aa3 quinol oxidase polypeptide II (EC 1.9.3.1)                           | Energy production and conversion                 | 5.63E-09 | -3.40              |
| SAUSA300_0966     | purE    | Phosphoribosylaminoimidazole carboxylase carboxyltransferase                        | Nucleotide transport and metabolism              | 1.43E-10 | -7.11              |
| SAUSA300_0967     | purK    | Phosphoribosylaminoimidazole carboxylase NCAIR mutant                               | Nucleotide transport and metabolism              | 1.57E-08 | -3.14              |
| SAUSA300_0968     | purC    | Phosphoribosylamidoimidazole-succinocarboxamide synthetase                          | Nucleotide transport and metabolism              | 4.99E-08 | -2.32              |
| SAUSA300_0969     | purS    | Phosphoribosylformylglycinamide synthase, purS component                            | Nucleotide transport and metabolism              | 2.22E-10 | -10.50             |
| SAUSA300_0970     | purQ    | Phosphoribosylformylglycinamide synthase (EC 6.3.5.3)                               | Nucleotide transport and metabolism              | 1.99E-10 | -28.25             |
| SAUSA300_0971     | purL    | Phosphoribosylformylglycinamide synthase (EC 6.3.5.3)                               | Nucleotide transport and metabolism              | 1.22E-10 | -4.03              |
| SAUSA300_0972     | purF    | Amidophosphoribosyltransferase (EC 2.4.2.14)                                        | Nucleotide transport and metabolism              | 2.43E-15 | -24.54             |
| SAUSA300_0973     | purM    | Phosphoribosylformylglycinamide cyclo-ligase (EC 6.3.5.1)                           | Nucleotide transport and metabolism              | 3.25E-13 | -7.26              |
| SAUSA300_0974     | purN    | Phosphoribosylglycinamide formyltransferase (EC 2.1.2.2)                            | Nucleotide transport and metabolism              | 1.07E-13 | -15.31             |
| SAUSA300_0975     | purH    | Phosphoribosylaminoimidazolecarboxamide formyltransferase                           | Nucleotide transport and metabolism              | 1.26E-10 | -44.59             |
| SAUSA300_0976     | purD    | Phosphoribosylamine--glycine ligase (EC 6.3.4.13)                                   | Nucleotide transport and metabolism              | 6.00E-12 | -4.46              |
| SAUSA300_0977     | -       | Hydroxymethylpyrimidine transport system permease protein                           | Inorganic ion transport and metabolism           | 5.39E-03 | 4.51               |
| SAUSA300_0978     | -       | Hydroxymethylpyrimidine transport ATP-binding protein                               | General function prediction only                 | 8.37E-08 | 3.65               |
| SAUSA300_0979     | -       | Hydroxymethylpyrimidine transport system permease protein                           | Function unknown                                 | 3.27E-08 | 22.40              |
| SAUSA300_0982     | -       | Radical activating enzymes proteins                                                 | ---                                              | 1.42E-12 | -4.02              |
| SAUSA300_0985     | -       | Hypothetical protein                                                                | Posttranslational modification, protein turnover | 1.89E-04 | 18.59              |
| SAUSA300_0986     | -       | Cytochrome d ubiquinol oxidase subunit I (EC 1.10.3.-)                              | Energy production and conversion                 | 1.43E-08 | 11.38              |
| SAUSA300_0990     | -       | Putative transcriptional regulator                                                  | Function unknown                                 | 6.27E-04 | -4.37              |
| SAUSA300_0991     | def     | Peptide deformylase (EC 3.5.1.88)                                                   | Translation                                      | 4.81E-04 | 4.11               |
| SAUSA300_0992     | -       | Hypothetical protein                                                                | ---                                              | 7.77E-03 | 16.04              |
| SAUSA300_0995     | -       | Dihydroipoamide acetyltransferase component of pyruvate dehydrogenase complex       | Energy production and conversion                 | 1.38E-03 | -2.19              |
| SAUSA300_0999     | potA    | Spermidine/putrescine transport ATP-binding protein potA                            | Amino acid transport and metabolism              | 4.53E-03 | 10.17              |
| SAUSA300_1003     | -       | Hypothetical protein                                                                | ---                                              | 2.30E-11 | -8.37              |
| SAUSA300_1004     | -       | Hypothetical protein                                                                | ---                                              | 2.08E-02 | 2.21               |
| SAUSA300_1005     | -       | Manganese transport protein mntH                                                    | Inorganic ion transport and metabolism           | 7.06E-03 | -5.11              |
| SAUSA300_1009     | typA    | GTP-binding protein TypA/BjpA                                                       | Signal transduction mechanisms                   | 1.42E-05 | -5.12              |
| SAUSA300_1015     | ctaA    | Heme O monooxygenase (EC 1.-.-.-)                                                   | Posttranslational modification, protein turnover | 4.50E-05 | -4.56              |

| probe set mapping | synonym | description                                                   | NCBI COG                                | p-value  | day one / inoculum |
|-------------------|---------|---------------------------------------------------------------|-----------------------------------------|----------|--------------------|
| SAUSA300_1017     | -       | Hypothetical membrane spanning protein                        | Function unknown                        | 5.89E-05 | -6.25              |
| SAUSA300_1020     | -       | Glycerophosphoryl diester phosphodiesterase (EC 3.1.4.4)      | Energy production and conversion        | 1.79E-09 | 5.50               |
| SAUSA300_1027     | rpmF    | LSU ribosomal protein L32P                                    | Translation                             | 2.92E-03 | 2.02               |
| SAUSA300_1028     | -       | Fibronectin-binding protein                                   | ---                                     | 9.96E-10 | 124.58             |
| SAUSA300_1029     | -       | Fibronectin-binding protein                                   | ---                                     | 2.95E-06 | 13.90              |
| SAUSA300_1030     | -       | Cell surface protein                                          | ---                                     | 1.20E-09 | 13.52              |
| SAUSA300_1031     | -       | Hypothetical membrane associated protein                      | ---                                     | 6.34E-11 | 44.84              |
| SAUSA300_1032     | -       | Ferrichrome-binding protein                                   | Inorganic ion transport and metabolism  | 3.44E-10 | 38.15              |
| SAUSA300_1033     | -       | Transporter                                                   | Inorganic ion transport and metabolism  | 1.19E-12 | 11.64              |
| SAUSA300_1034     | srtB    | Sortase B family protein                                      | Function unknown                        | 3.63E-07 | 13.73              |
| SAUSA300_1035     | -       | Hypothetical cytosolic protein                                | General function prediction only        | 2.67E-05 | 16.32              |
| SAUSA300_1036     | -       | 23S rRNA methyltransferase (EC 2.1.1.-)                       | Translation                             | 5.96E-03 | 2.43               |
| SAUSA300_1037     | pheS    | Phenylalanyl-tRNA synthetase alpha chain (EC 6.1.1.20)        | Translation                             | 6.34E-06 | 5.27               |
| SAUSA300_1046     | sdhC    | Succinate dehydrogenase cytochrome b558 subunit (EC 1.3.99.1) | Energy production and conversion        | 1.65E-07 | -2.23              |
| SAUSA300_1047     | sdhA    | Succinate dehydrogenase flavoprotein subunit (EC 1.3.99.1)    | Energy production and conversion        | 8.24E-10 | -2.26              |
| SAUSA300_1048     | sdhB    | Succinate dehydrogenase iron-sulfur protein (EC 1.3.99.1)     | Energy production and conversion        | 2.91E-10 | -3.31              |
| SAUSA300_1051     | -       | putative phosphoesterase                                      | General function prediction only        | 9.50E-07 | -5.09              |
| SAUSA300_1053     | -       | Hypothetical protein                                          | ---                                     | 5.41E-04 | 8.35               |
| SAUSA300_1054     | -       | Hypothetical membrane spanning protein                        | ---                                     | 2.29E-06 | 4.47               |
| SAUSA300_1057     | -       | Hypothetical protein                                          | ---                                     | 2.61E-04 | -3.71              |
| SAUSA300_1059     | -       | Exotoxin                                                      | ---                                     | 2.99E-14 | 23.97              |
| SAUSA300_1060     | -       | Exotoxin                                                      | ---                                     | 4.95E-10 | 6.88               |
| SAUSA300_1061     | -       | Exotoxin                                                      | ---                                     | 1.49E-08 | 35.50              |
| SAUSA300_1062     | argF    | Ornithine carbamoyltransferase (EC 2.1.3.3)                   | Amino acid transport and metabolism     | 7.78E-06 | 12.12              |
| SAUSA300_1063     | arcC    | Carbamate kinase (EC 2.7.2.2)                                 | Amino acid transport and metabolism     | 1.25E-07 | 10.69              |
| SAUSA300_1067     | -       | Antibacterial protein 3                                       | ---                                     | 2.04E-10 | -18.22             |
| SAUSA300_1068     | -       | PHENOL SOLUBLE MODULIN BETA 1                                 | ---                                     | 5.18E-12 | -25.48             |
| SAUSA300_1069     | -       | Hydrolase (HAD superfamily)                                   | General function prediction only        | 9.36E-03 | 2.42               |
| SAUSA300_1070     | -       | Acetyltransferase (EC 2.3.1.-)                                | ---                                     | 3.50E-03 | -2.89              |
| SAUSA300_1071     | -       | Hypothetical membrane spanning protein                        | Function unknown                        | 1.12E-03 | 3.45               |
| SAUSA300_1073     | mraW    | S-adenosyl-methyltransferase mraW (EC 2.1.1.-)                | Cell wall/membrane biogenesis           | 2.83E-04 | -4.03              |
| SAUSA300_1074     | ftsL    | Cell division protein ftsL                                    | Cell cycle control, mitosis and meiosis | 1.48E-03 | -2.14              |
| SAUSA300_1087     | ileS    | Isoleucyl-tRNA synthetase (EC 6.1.1.5)                        | Translation                             | 9.87E-07 | 5.41               |
| SAUSA300_1091     | pyrR    | Uracil phosphoribosyltransferase (EC 2.4.2.9) / Pyrimidin     | Nucleotide transport and metabolism     | 1.75E-05 | -2.50              |
| SAUSA300_1093     | pyrB    | Aspartate carbamoyltransferase (EC 2.1.3.2)                   | Nucleotide transport and metabolism     | 1.37E-06 | -2.83              |
| SAUSA300_1095     | carA    | Carbamoyl-phosphate synthase small chain (EC 6.3.5.5)         | Amino acid transport and metabolism     | 7.86E-10 | -2.14              |
| SAUSA300_1097     | pyrF    | Orotidine 5'-phosphate decarboxylase (EC 4.1.1.23)            | Nucleotide transport and metabolism     | 5.27E-05 | -13.66             |
| SAUSA300_1098     | pyrE    | Orotate phosphoribosyltransferase (EC 2.4.2.10)               | Nucleotide transport and metabolism     | 2.37E-10 | -6.32              |
| SAUSA300_1099     | -       | Hypothetical protein                                          | ---                                     | 8.10E-08 | 2.86               |
| SAUSA300_1105     | priA    | Primosomal protein N'                                         | Replication, recombination and repair   | 4.52E-04 | -3.34              |
| SAUSA300_1110     | sun     | 16S rRNA m(5)C 967 methyltransferase (EC 2.1.1.-)             | Translation                             | 2.80E-06 | -4.22              |
| SAUSA300_1112     | -       | Protein phosphatase 2C (EC 3.1.3.16)                          | Signal transduction mechanisms          | 9.25E-06 | -3.18              |
| SAUSA300_1113     | pknB    | Serine/threonine protein kinase (EC 2.7.11.1)                 | Function unknown                        | 3.89E-04 | -3.27              |
| SAUSA300_1117     | rpmB    | LSU ribosomal protein L28P                                    | Translation                             | 1.43E-09 | -3.42              |
| SAUSA300_1118     | -       | General stress protein, Gls24 family                          | ---                                     | 2.58E-02 | 2.20               |
| SAUSA300_1120     | recG    | ATP-dependent DNA helicase recG (EC 3.6.1.-)                  | Replication, recombination and repair   | 1.79E-02 | 4.52               |
| SAUSA300_1128     | ftsY    | Cell division protein ftsY                                    | Intracellular trafficking and secretion | 5.11E-03 | -5.98              |
| SAUSA300_1135     | -       | Integral membrane protein                                     | Function unknown                        | 2.50E-04 | 2.61               |
| SAUSA300_1138     | sucC    | Succinyl-CoA synthetase beta chain (EC 6.2.1.5)               | Energy production and conversion        | 5.54E-03 | -2.90              |
| SAUSA300_1140     | lytN    | Cell wall hydrolase LytN                                      | ---                                     | 2.87E-05 | 12.38              |
| SAUSA300_1141     | -       | UDP-N-acetylmuramoylheptapeptide-glycine L-seryltrans         | Defense mechanisms/Virulence            | 2.45E-09 | 12.29              |
| SAUSA300_1142     | dprA    | DNA processing protein                                        | Replication, recombination and repair   | 2.54E-08 | 18.00              |
| SAUSA300_1143     | topA    | DNA topoisomerase I (EC 5.99.1.2)                             | Replication, recombination and repair   | 1.75E-02 | 2.65               |
| SAUSA300_1146     | hslV    | ATP-dependent endopeptidase hsl proteolytic subunit hslV      | ---                                     | 2.15E-05 | -2.89              |
| SAUSA300_1147     | hslU    | ATP-dependent endopeptidase hsl ATP-binding subunit hsl       | ---                                     | 5.73E-06 | -2.73              |
| SAUSA300_1155     | -       | Membrane endopeptidase, M50 family                            | Cell wall/membrane biogenesis           | 4.77E-03 | -2.73              |
| SAUSA300_1156     | proS    | Prolyl-tRNA synthetase (EC 6.1.1.15)                          | Translation                             | 2.10E-03 | -2.46              |
| SAUSA300_1157     | polC    | DNA polymerase III alpha subunit (EC 2.7.7.7)                 | Replication, recombination and repair   | 3.68E-11 | 2.30               |
| SAUSA300_1163     | rbfA    | Ribosome-binding factor A                                     | Translation                             | 2.49E-02 | 2.31               |
| SAUSA300_1164     | truB    | tRNA pseudouridine synthase B (EC 4.2.1.70)                   | Translation                             | 1.14E-04 | -3.22              |
| SAUSA300_1165     | ribF    | Riboflavin kinase (EC 2.7.1.26) / FMN adenylyltransferas      | Coenzyme transport and metabolism       | 3.40E-09 | -2.09              |
| SAUSA300_1167     | pnpA    | Polyribonucleotide nucleotidyltransferase (EC 2.7.7.8) / P    | Translation                             | 2.81E-03 | -2.13              |
| SAUSA300_1174     | -       | Protein with ACT domain                                       | ---                                     | 5.07E-05 | -2.13              |
| SAUSA300_1176     | pgsA    | CDP-diacylglycerol--glycerol-3-phosphate 3-phosphatidy        | Lipid transport and metabolism          | 3.91E-09 | -8.99              |
| SAUSA300_1182     | -       | 2-oxoacid ferredoxin oxidoreductase, alpha subunit (EC 1      | Energy production and conversion        | 1.63E-05 | 2.01               |
| SAUSA300_1183     | -       | 2-oxoacid ferredoxin oxidoreductase, beta subunit (EC 1.2     | Energy production and conversion        | 4.35E-04 | 5.96               |
| SAUSA300_1184     | -       | Hypothetical protein                                          | Function unknown                        | 2.85E-03 | 3.71               |
| SAUSA300_1187     | -       | Hydroxyethylthiazole permease                                 | Function unknown                        | 1.53E-03 | -7.88              |
| SAUSA300_1189     | mutL    | DNA mismatch repair protein mutL                              | Replication, recombination and repair   | 1.91E-04 | -2.48              |
| SAUSA300_1194     | -       | Lysophospholipase L2 (EC 3.1.1.5)                             | Lipid transport and metabolism          | 3.82E-03 | 5.99               |
| SAUSA300_1196     | hfq     | RNA-binding protein, Hfq family                               | General function prediction only        | 1.43E-02 | -2.09              |
| SAUSA300_1200     | glnR    | Transcriptional regulator, MerR family                        | Transcription                           | 1.51E-07 | -3.55              |
| SAUSA300_1201     | glnA    | Glutamine synthetase (EC 6.3.1.2)                             | Amino acid transport and metabolism     | 6.24E-09 | -3.65              |
| SAUSA300_1205     | -       | Hypothetical protein                                          | ---                                     | 1.04E-04 | -4.76              |
| SAUSA300_1206     | -       | Hypothetical protein                                          | ---                                     | 2.72E-03 | 18.84              |
| SAUSA300_1211     | -       | Hypothetical protein                                          | ---                                     | 6.64E-03 | 5.23               |
| SAUSA300_1217     | -       | ABC transporter ATP-binding protein                           | Defense mechanisms/Virulence            | 1.89E-04 | 22.63              |
| SAUSA300_1218     | -       | ABC transporter permease protein                              | Defense mechanisms/Virulence            | 2.26E-02 | 21.30              |
| SAUSA300_1222     | nuc     | Thermonuclease (EC 3.1.31.1)                                  | Replication, recombination and repair   | 4.15E-08 | 14.90              |
| SAUSA300_1225     | -       | Aspartokinase (EC 2.7.2.4)                                    | Amino acid transport and metabolism     | 6.33E-07 | 2.82               |

| probe set mapping | synonym | description                                               | NCBI COG                                         | p-value  | day one / inoculum |
|-------------------|---------|-----------------------------------------------------------|--------------------------------------------------|----------|--------------------|
| SAUSA300_1230     | -       | Hypothetical protein                                      | ---                                              | 2.18E-03 | -2.17              |
| SAUSA300_1231     | -       | Lysine-specific permease                                  | Amino acid transport and metabolism              | 3.33E-07 | -2.18              |
| SAUSA300_1233     | rpmG    | LSU ribosomal protein L33P                                | Translation                                      | 2.42E-03 | -2.18              |
| SAUSA300_1234     | rpsN    | SSU ribosomal protein S14P                                | Translation                                      | 2.35E-03 | 9.52               |
| SAUSA300_1235     | guaC    | GMP reductase (EC 1.7.1.7)                                | Nucleotide transport and metabolism              | 1.03E-11 | 5.56               |
| SAUSA300_1237     | lexA    | LexA repressor (EC 3.4.21.88)                             | Transcription                                    | 5.52E-07 | -3.44              |
| SAUSA300_1246     | acnA    | Aconitate hydratase (EC 4.2.1.3)                          | Energy production and conversion                 | 2.87E-11 | -2.13              |
| SAUSA300_1247     | -       | Thioesterase (EC 3.1.2.-)                                 | General function prediction only                 | 2.24E-05 | -3.04              |
| SAUSA300_1248     | -       | Hypothetical cytosolic protein                            | Function unknown                                 | 7.14E-05 | 2.30               |
| SAUSA300_1251     | parC    | Topoisomerase IV subunit A (EC 5.99.1.-)                  | Replication, recombination and repair            | 6.07E-05 | -2.47              |
| SAUSA300_1255     | fimC    | Lysyltransferase (EC 2.3.2.3)                             | ---                                              | 4.90E-04 | -2.17              |
| SAUSA300_1256     | mstrA   | Peptide methionine sulfoxide reductase mstrA (EC 1.8.4.1) | Posttranslational modification, protein turnover | 7.81E-05 | 2.31               |
| SAUSA300_1257     | mstrR   | Transcriptional regulator, LytR family                    | Transcription                                    | 5.29E-03 | 2.28               |
| SAUSA300_1259     | -       | ImpB/MucB/SamB family protein                             | Replication, recombination and repair            | 6.79E-09 | 4.56               |
| SAUSA300_1261     | -       | Deblocking aminopeptidase (EC 3.4.11.-)                   | Carbohydrate transport and metabolism            | 7.57E-03 | -2.73              |
| SAUSA300_1262     | trpE    | Anthranilate synthase component I (EC 4.1.3.27)           | Amino acid transport and metabolism              | 1.25E-04 | 4.81               |
| SAUSA300_1263     | trpG    | Anthranilate synthase component II (EC 4.1.3.27) / Para-a | Amino acid transport and metabolism              | 3.57E-08 | 5.08               |
| SAUSA300_1264     | trpD    | Anthranilate phosphoribosyltransferase (EC 2.4.2.18)      | Amino acid transport and metabolism              | 3.02E-09 | 5.79               |
| SAUSA300_1265     | trpC    | Indole-3-glycerol phosphate synthase (EC 4.1.1.48)        | Amino acid transport and metabolism              | 1.01E-02 | 8.98               |
| SAUSA300_1266     | trpF    | N-(5'-phosphoribosyl)anthranilate isomerase (EC 5.3.1.24) | Amino acid transport and metabolism              | 3.47E-13 | 34.62              |
| SAUSA300_1267     | trpB    | Tryptophan synthase beta chain (EC 4.2.1.20)              | Amino acid transport and metabolism              | 5.50E-12 | 26.98              |
| SAUSA300_1268     | trpA    | Tryptophan synthase alpha chain (EC 4.2.1.20)             | Amino acid transport and metabolism              | 1.04E-06 | 15.92              |
| SAUSA300_1270     | femB    | UDP-N-acetylmuramoylpentapeptide-triglycine glycylyltran  | Defense mechanisms/Virulence                     | 8.93E-05 | -2.19              |
| SAUSA300_1277     | -       | Permease                                                  | ---                                              | 2.28E-07 | 7.28               |
| SAUSA300_1286     | -       | Aspartokinase (EC 2.7.2.4)                                | Amino acid transport and metabolism              | 2.18E-14 | 25.20              |
| SAUSA300_1287     | asd     | Aspartate-semialdehyde dehydrogenase (EC 1.2.1.11)        | Amino acid transport and metabolism              | 5.83E-03 | 3.97               |
| SAUSA300_1288     | dapA    | Dihydrodipicolinate synthase (EC 4.2.1.52)                | Amino acid transport and metabolism              | 1.16E-04 | 4.76               |
| SAUSA300_1289     | dapB    | Dihydrodipicolinate reductase (EC 1.3.1.26)               | Amino acid transport and metabolism              | 4.56E-05 | 4.48               |
| SAUSA300_1290     | dapD    | Tetrahydrodipicolinate N-acetyltransferase (EC 2.3.1.89)  | Amino acid transport and metabolism              | 1.11E-06 | 3.73               |
| SAUSA300_1291     | -       | Putative N-acetyldiaminopimelate deacetylase (EC 3.5.1.4) | General function prediction only                 | 7.23E-10 | 7.10               |
| SAUSA300_1293     | lysA    | Diaminopimelate decarboxylase (EC 4.1.1.20)               | Amino acid transport and metabolism              | 2.95E-05 | 5.33               |
| SAUSA300_1295     | -       | Cold shock protein                                        | ---                                              | 1.12E-03 | -3.10              |
| SAUSA300_1300     | brnQ    | Branched-chain amino acid transport system carrier protei | Amino acid transport and metabolism              | 1.20E-11 | 29.57              |
| SAUSA300_1305     | sucB    | Dihydroipamide succinyltransferase component (E2) of      | Energy production and conversion                 | 2.89E-05 | -2.47              |
| SAUSA300_1306     | sucA    | 2-oxoglutarate dehydrogenase E1 component (EC 1.2.4.2)    | Energy production and conversion                 | 9.97E-11 | -3.74              |
| SAUSA300_1307     | arlS    | Two-component sensor kinase arlS (EC 2.7.3.-)             | Signal transduction mechanisms                   | 1.03E-12 | -3.72              |
| SAUSA300_1311     | murG    | UDP-N-acetylglucosamine--N-acetylmuramyl-(pentapepti      | Cell wall/membrane biogenesis                    | 1.14E-04 | 2.40               |
| SAUSA300_1319     | folA    | Dihydrofolate reductase (EC 1.5.1.3)                      | Coenzyme transport and metabolism                | 1.32E-06 | -2.83              |
| SAUSA300_1320     | thyA    | Thymidylate synthase (EC 2.1.1.45)                        | Nucleotide transport and metabolism              | 3.02E-13 | -3.93              |
| SAUSA300_1321     | -       | Hypothetical protein                                      | ---                                              | 2.43E-05 | -9.67              |
| SAUSA300_1325     | -       | Hypothetical protein                                      | ---                                              | 3.18E-13 | 66.06              |
| SAUSA300_1326     | -       | Ribonuclease HI (EC 3.1.26.4) / Cell wall enzyme EBSB     | Replication, recombination and repair            | 7.19E-10 | 40.47              |
| SAUSA300_1327     | -       | Erythrocyte membrane binding protein                      | Replication, recombination and repair            | 9.14E-10 | 21.04              |
| SAUSA300_1328     | -       | Multidrug resistance protein B                            | ---                                              | 1.30E-09 | 8.27               |
| SAUSA300_1329     | -       | Amino acid permease                                       | Amino acid transport and metabolism              | 8.25E-03 | 7.66               |
| SAUSA300_1330     | ilvA    | Threonine dehydratase (EC 4.3.1.19)                       | Amino acid transport and metabolism              | 3.44E-06 | 5.31               |
| SAUSA300_1331     | ald     | Alanine dehydrogenase (EC 1.4.1.1)                        | Amino acid transport and metabolism              | 1.40E-06 | 37.90              |
| SAUSA300_1333     | -       | putative GTPases (dynamin-related)                        | General function prediction only                 | 4.25E-04 | 2.81               |
| SAUSA300_1335     | -       | Hypothetical protein                                      | ---                                              | 1.64E-06 | 4.11               |
| SAUSA300_1342     | -       | Hypothetical protein                                      | ---                                              | 1.21E-03 | 2.61               |
| SAUSA300_1345     | asnC    | Asparaginyl-tRNA synthetase (EC 6.1.1.22)                 | Translation                                      | 2.45E-06 | -5.08              |
| SAUSA300_1346     | -       | ATP-dependent helicase, DinG family                       | Transcription                                    | 8.59E-16 | 9.37               |
| SAUSA300_1353     | -       | Hypothetical cytosolic protein                            | Function unknown                                 | 1.28E-02 | -5.98              |
| SAUSA300_1359     | -       | Farnesyl pyrophosphate synthetase (EC 2.5.1.1) / Geranyl  | Coenzyme transport and metabolism                | 1.53E-07 | -2.39              |
| SAUSA300_1360     | ubiE    | S-adenosylmethionine:2-demethylmenaquinone methyltra      | Coenzyme transport and metabolism                | 1.68E-06 | -5.10              |
| SAUSA300_1363     | gpsA    | Glycerol-3-phosphate dehydrogenase [NAD(P)+] (EC 1.1      | Energy production and conversion                 | 2.92E-04 | -2.56              |
| SAUSA300_1367     | cmk     | Cytidylyl kinase (EC 2.7.4.14)                            | Nucleotide transport and metabolism              | 8.77E-04 | -3.21              |
| SAUSA300_1368     | ansA    | L-asparaginase (EC 3.5.1.1)                               | Amino acid transport and metabolism              | 4.39E-06 | 18.18              |
| SAUSA300_1371     | recQ    | ATP-dependent DNA helicase recQ (EC 3.6.1.-)              | Replication, recombination and repair            | 2.57E-04 | -2.63              |
| SAUSA300_1372     | -       | Hypothetical protein                                      | Function unknown                                 | 1.03E-02 | -2.30              |
| SAUSA300_1375     | -       | Hypothetical protein                                      | ---                                              | 1.17E-02 | 7.60               |
| SAUSA300_1377     | -       | Hypothetical protein                                      | ---                                              | 2.84E-02 | 13.38              |
| SAUSA300_1378     | -       | Hypothetical cytosolic protein                            | ---                                              | 7.78E-06 | 173.60             |
| SAUSA300_1379     | -       | Hypothetical cytosolic protein                            | ---                                              | 4.28E-07 | 10.33              |
| SAUSA300_1380     | -       | Hypothetical protein                                      | ---                                              | 1.66E-13 | 23.81              |
| SAUSA300_1382     | lukS-PV | Leukocidin S subunit                                      | ---                                              | 4.94E-03 | 12.74              |
| SAUSA300_1383     | -       | N-acetylmuramoyl-L-alanine amidase (EC 3.5.1.28)          | ---                                              | 1.15E-15 | 71.91              |
| SAUSA300_1384     | -       | Holin                                                     | ---                                              | 2.95E-06 | 81.74              |
| SAUSA300_1385     | -       | Phage protein                                             | ---                                              | 1.20E-05 | 34.38              |
| SAUSA300_1387     | -       | Phage protein                                             | ---                                              | 8.08E-07 | 68.50              |
| SAUSA300_1388     | -       | Phage protein                                             | ---                                              | 1.93E-09 | 50.40              |
| SAUSA300_1389     | -       | Teichoic acid biosynthesis protein C                      | ---                                              | 3.54E-10 | 47.58              |
| SAUSA300_1390     | -       | Hypothetical protein                                      | ---                                              | 3.81E-06 | 10.21              |
| SAUSA300_1393     | -       | Phage protein                                             | General function prediction only                 | 1.33E-11 | 8.85               |
| SAUSA300_1394     | -       | Hypothetical protein                                      | ---                                              | 4.64E-11 | 37.97              |
| SAUSA300_1395     | -       | Hypothetical protein                                      | ---                                              | 5.56E-07 | 92.08              |
| SAUSA300_1397     | -       | Major tail protein                                        | ---                                              | 2.83E-08 | 13.61              |
| SAUSA300_1398     | -       | Hypothetical protein                                      | ---                                              | 3.23E-07 | 21.18              |
| SAUSA300_1400     | -       | Phage protein                                             | ---                                              | 4.14E-06 | 19.39              |
| SAUSA300_1401     | -       | Phage Prohead Protease                                    | ---                                              | 1.90E-08 | 26.17              |



| probe set mapping | synonym | description                                                   | NCBI COG                                      | p-value  | day one / inoculum |
|-------------------|---------|---------------------------------------------------------------|-----------------------------------------------|----------|--------------------|
| SAUSA300_1402     | -       | ATP-dependent endopeptidase clp proteolytic subunit clpP      | Posttranslational modification, protein turno | 8.20E-06 | 10.72              |
| SAUSA300_1404     | -       | Terminase large subunit                                       | General function prediction only              | 1.02E-13 | 52.14              |
| SAUSA300_1406     | -       | Phage endonuclease                                            | Defense mechanisms/Virulence                  | 3.55E-08 | 20.06              |
| SAUSA300_1408     | -       | Phage-related DNA helicase                                    | Transcription                                 | 2.96E-05 | 4.81               |
| SAUSA300_1410     | -       | Virulence-associated protein E                                | ---                                           | 5.37E-12 | 37.73              |
| SAUSA300_1411     | -       | Phage protein                                                 | ---                                           | 6.58E-04 | 2.64               |
| SAUSA300_1417     | -       | Hypothetical cytosolic protein                                | Function unknown                              | 4.06E-08 | 44.23              |
| SAUSA300_1419     | -       | Hypothetical protein                                          | ---                                           | 1.34E-06 | 49.85              |
| SAUSA300_1420     | -       | Phage protein                                                 | ---                                           | 1.30E-06 | 26.61              |
| SAUSA300_1421     | -       | Phage protein                                                 | ---                                           | 1.88E-11 | 20.87              |
| SAUSA300_1423     | polA    | PHAGE-RELATED DNA POLYMERASE (EC 2.7.7.7)                     | Replication, recombination and repair         | 4.00E-09 | 17.50              |
| SAUSA300_1424     | -       | Phage protein                                                 | ---                                           | 5.73E-09 | 29.06              |
| SAUSA300_1425     | -       | Phage protein                                                 | ---                                           | 4.50E-11 | 23.24              |
| SAUSA300_1426     | -       | Hypothetical protein                                          | ---                                           | 6.12E-08 | 242.90             |
| SAUSA300_1430     | -       | Phage protein                                                 | ---                                           | 5.57E-05 | 9.64               |
| SAUSA300_1431     | -       | Phage protein                                                 | ---                                           | 3.78E-08 | 202.86             |
| SAUSA300_1433     | -       | Transcriptional regulator, pbsX family                        | Transcription                                 | 5.09E-10 | 78.53              |
| SAUSA300_1442     | srrA    | Transcriptional regulatory protein resD                       | Signal transduction mechanisms                | 1.37E-03 | -3.00              |
| SAUSA300_1443     | rluB    | Ribosomal large subunit pseudouridine synthase B (EC 4.4.1.1) | Translation                                   | 4.37E-09 | -3.89              |
| SAUSA300_1444     | scpB    | Segregation and condensation protein ScpB                     | Transcription                                 | 2.05E-06 | -3.43              |
| SAUSA300_1446     | -       | Hypothetical protein                                          | Function unknown                              | 4.97E-07 | 15.48              |
| SAUSA300_1448     | -       | Ferric uptake regulation protein                              | Inorganic ion transport and metabolism        | 1.48E-02 | -2.09              |
| SAUSA300_1452     | proC    | Proline-5-carboxylate reductase (EC 1.5.1.2)                  | Amino acid transport and metabolism           | 3.06E-02 | 2.64               |
| SAUSA300_1458     | -       | Lactoylglutathione lyase (EC 4.4.1.5)                         | Amino acid transport and metabolism           | 1.74E-04 | -4.52              |
| SAUSA300_1463     | -       | Hypothetical protein                                          | ---                                           | 3.79E-05 | 3.03               |
| SAUSA300_1469     | argR    | Arginine repressor, argR                                      | Transcription                                 | 4.96E-04 | -2.25              |
| SAUSA300_1471     | xseB    | Exodeoxyribonuclease VII small subunit (EC 3.1.11.6)          | Replication, recombination and repair         | 1.81E-02 | 2.33               |
| SAUSA300_1474     | -       | General stress protein, Gls24 family                          | ---                                           | 5.93E-04 | -2.82              |
| SAUSA300_1480     | -       | Secretory antigen precursor SsaA                              | ---                                           | 4.51E-04 | 8.45               |
| SAUSA300_1481     | -       | Hypothetical protein                                          | ---                                           | 5.97E-07 | 10.57              |
| SAUSA300_1482     | -       | FtsK/SpoIIIE family                                           | Cell cycle control, mitosis and meiosis       | 3.81E-05 | 36.51              |
| SAUSA300_1483     | -       | DNA segregation ATPase and related proteins                   | Intracellular trafficking and secretion       | 9.26E-11 | 10.41              |
| SAUSA300_1484     | -       | Hypothetical protein                                          | ---                                           | 5.99E-03 | 2.60               |
| SAUSA300_1486     | -       | Hypothetical protein                                          | ---                                           | 7.21E-08 | 26.53              |
| SAUSA300_1487     | -       | Transcriptional regulator, Cro/C1 family                      | Replication, recombination and repair         | 4.38E-09 | 6.64               |
| SAUSA300_1488     | -       | Hypothetical protein                                          | ---                                           | 1.83E-02 | 4.56               |
| SAUSA300_1489     | -       | Hypothetical protein                                          | ---                                           | 8.44E-05 | 9.63               |
| SAUSA300_1490     | efp     | Protein Translation Elongation Factor P (EF-P)                | Translation                                   | 6.78E-07 | -2.50              |
| SAUSA300_1492     | -       | Hypothetical protein                                          | ---                                           | 1.96E-02 | 6.04               |
| SAUSA300_1496     | -       | Glycine dehydrogenase [decarboxylating] (EC 1.4.4.2)          | Amino acid transport and metabolism           | 2.28E-03 | 3.26               |
| SAUSA300_1498     | gcvT    | Aminomethyltransferase (EC 2.1.2.10)                          | Amino acid transport and metabolism           | 9.63E-09 | 3.50               |
| SAUSA300_1500     | -       | Hypothetical membrane associated protein                      | Intracellular trafficking and secretion       | 2.78E-04 | 40.18              |
| SAUSA300_1501     | -       | ComG operon protein 4                                         | ---                                           | 1.03E-04 | 6.41               |
| SAUSA300_1502     | -       | ComG operon protein 3                                         | ---                                           | 1.90E-05 | 4.38               |
| SAUSA300_1503     | -       | ComG operon protein 2                                         | ---                                           | 3.06E-03 | 22.61              |
| SAUSA300_1504     | -       | ComG operon protein 1                                         | ---                                           | 2.85E-04 | 9.04               |
| SAUSA300_1506     | -       | Hypothetical cytosolic protein                                | Function unknown                              | 9.08E-06 | -6.63              |
| SAUSA300_1507     | glk     | Glucokinase (EC 2.7.1.2)                                      | Transcription                                 | 1.65E-13 | -18.82             |
| SAUSA300_1508     | -       | Hypothetical cytosolic protein                                | Function unknown                              | 5.82E-11 | -10.20             |
| SAUSA300_1512     | pbp3    | Penicillin binding protein transpeptidase                     | Cell wall/membrane biogenesis                 | 5.23E-07 | 2.99               |
| SAUSA300_1513     | -       | Superoxide dismutase (EC 1.15.1.1)                            | Inorganic ion transport and metabolism        | 3.09E-06 | -2.59              |
| SAUSA300_1519     | -       | NIF3-related protein                                          | Function unknown                              | 2.86E-03 | 2.39               |
| SAUSA300_1520     | -       | Hypothetical cytosolic protein                                | General function prediction only              | 5.34E-09 | -2.27              |
| SAUSA300_1521     | rpoD    | RNA polymerase sigma factor rpoD                              | Transcription                                 | 2.20E-07 | -2.35              |
| SAUSA300_1522     | dnaG    | DNA primase (EC 2.7.7.-)                                      | Replication, recombination and repair         | 2.92E-06 | -13.52             |
| SAUSA300_1525     | glyS    | Glycyl-tRNA synthetase (EC 6.1.1.14)                          | Translation                                   | 1.27E-14 | -3.93              |
| SAUSA300_1526     | recO    | DNA repair protein recO                                       | Replication, recombination and repair         | 2.76E-06 | -2.73              |
| SAUSA300_1529     | dgkA    | Diacylglycerol kinase (EC 2.7.1.107)                          | Cell wall/membrane biogenesis                 | 5.18E-07 | -3.18              |
| SAUSA300_1530     | -       | Hypothetical metal-binding protein                            | General function prediction only              | 2.27E-05 | -9.72              |
| SAUSA300_1531     | phoH    | PhoH protein                                                  | Signal transduction mechanisms                | 7.18E-08 | -11.08             |
| SAUSA300_1534     | -       | Transporter                                                   | Posttranslational modification, protein turno | 2.60E-03 | -2.49              |
| SAUSA300_1535     | rpsU    | SSU ribosomal protein S21P                                    | Translation                                   | 1.30E-03 | -2.51              |
| SAUSA300_1538     | prmA    | Ribosomal protein L11 methyltransferase (EC 2.1.1.-)          | Translation                                   | 2.58E-05 | 7.21               |
| SAUSA300_1539     | dnaJ    | Chaperone protein dnaJ                                        | ---                                           | 1.18E-09 | 4.81               |
| SAUSA300_1540     | dnaK    | Chaperone protein dnaK                                        | ---                                           | 6.91E-05 | 18.07              |
| SAUSA300_1541     | grpE    | GrpE protein                                                  | ---                                           | 8.42E-04 | 15.90              |
| SAUSA300_1542     | hrcA    | Heat-inducible transcription repressor hrcA                   | ---                                           | 1.25E-07 | 32.28              |
| SAUSA300_1545     | rpsT    | SSU ribosomal protein S20P                                    | Translation                                   | 2.18E-06 | -2.10              |
| SAUSA300_1546     | holA    | DNA polymerase III, delta subunit (EC 2.7.7.7)                | Replication, recombination and repair         | 2.18E-03 | 9.50               |
| SAUSA300_1547     | -       | COME operon protein 3                                         | ---                                           | 4.92E-03 | 6.33               |
| SAUSA300_1549     | -       | COME operon protein 1                                         | Replication, recombination and repair         | 7.01E-08 | 30.27              |
| SAUSA300_1550     | -       | Methyltransferase (EC 2.1.1.-)                                | ---                                           | 9.27E-05 | -2.96              |
| SAUSA300_1554     | -       | Hypothetical RNA binding protein                              | Translation                                   | 9.93E-05 | -3.26              |
| SAUSA300_1558     | mntN    | 5'-methylthioadenosine nucleosidase (EC 3.2.2.16) / S-ade     | Nucleotide transport and metabolism           | 7.00E-03 | 5.69               |
| SAUSA300_1559     | -       | Enterotoxin                                                   | ---                                           | 2.31E-05 | 3.43               |
| SAUSA300_1560     | -       | Fic family protein                                            | Function unknown                              | 1.33E-09 | 13.98              |
| SAUSA300_1561     | -       | Hypothetical membrane spanning protein                        | Inorganic ion transport and metabolism        | 9.10E-10 | -2.78              |
| SAUSA300_1564     | accB    | Biotin carboxyl carrier protein of acetyl-CoA carboxylase     | Lipid transport and metabolism                | 3.76E-06 | -3.03              |
| SAUSA300_1570     | -       | Peptidase family U32                                          | Posttranslational modification, protein turno | 3.01E-05 | -3.54              |
| SAUSA300_1572     | -       | Hypothetical cytosolic protein                                | Function unknown                              | 4.17E-05 | -2.39              |

| probe set mapping | synonym | description                                                 | NCBI COG                                      | p-value  | day one / inoculum |
|-------------------|---------|-------------------------------------------------------------|-----------------------------------------------|----------|--------------------|
| SAUSA300 1573     | -       | Endonuclease involved in recombination                      | Replication, recombination and repair         | 1.18E-04 | -2.48              |
| SAUSA300 1584     | -       | ATPase, AAA family                                          | Replication, recombination and repair         | 2.27E-12 | -8.88              |
| SAUSA300 1585     | -       | ThiF/MoeB family protein                                    | Coenzyme transport and metabolism             | 7.45E-03 | 3.40               |
| SAUSA300 1589     | dtl     | D-tyrosyl-tRNA(Tyr) deacylase (EC 3.1.-.-)                  | Translation                                   | 3.58E-05 | -2.52              |
| SAUSA300 1591     | apt     | Adenine phosphoribosyltransferase (EC 2.4.2.7)              | Nucleotide transport and metabolism           | 2.97E-04 | -3.30              |
| SAUSA300 1592     | recJ    | Single-stranded-DNA-specific exonuclease recJ (EC 3.1.-.-)  | Replication, recombination and repair         | 3.41E-06 | 6.79               |
| SAUSA300 1595     | tgt     | Queuine tRNA-ribosyltransferase (EC 2.4.2.29)               | Translation                                   | 7.51E-04 | -3.04              |
| SAUSA300 1596     | queA    | S-adenosylmethionine:tRNA ribosyltransferase-isomerase      | Translation                                   | 1.39E-06 | -4.07              |
| SAUSA300 1597     | ruvB    | Holliday junction DNA helicase ruvB                         | Replication, recombination and repair         | 1.49E-06 | -2.15              |
| SAUSA300 1598     | ruvA    | Holliday junction DNA helicase ruvA                         | Replication, recombination and repair         | 3.83E-10 | -2.32              |
| SAUSA300 1606     | -       | Hypothetical protein                                        | ---                                           | 7.76E-06 | 20.47              |
| SAUSA300 1610     | folC    | Folypolyglutamate synthase (EC 6.3.2.17) / Dihydrofolate    | Coenzyme transport and metabolism             | 3.92E-07 | -2.63              |
| SAUSA300 1615     | hemB    | Delta-aminolevulinic acid dehydratase (EC 4.2.1.24)         | Coenzyme transport and metabolism             | 5.30E-03 | 2.03               |
| SAUSA300 1617     | hemC    | Porphobilinogen deaminase (EC 2.5.1.61)                     | Coenzyme transport and metabolism             | 3.82E-08 | -7.27              |
| SAUSA300 1618     | hemX    | Putative heme export permease                               | Posttranslational modification, protein turno | 3.05E-06 | -6.16              |
| SAUSA300 1620     | engB    | GTP-binding protein YihA                                    | General function prediction only              | 1.18E-02 | 6.53               |
| SAUSA300 1625     | rplT    | LSU ribosomal protein L20P                                  | Translation                                   | 1.57E-05 | -3.68              |
| SAUSA300 1627     | infC    | Bacterial Protein Translation Initiation Factor 3 (IF-3)    | Translation                                   | 8.68E-08 | -2.35              |
| SAUSA300 1628     | lysP    | Lysine-specific permease                                    | Amino acid transport and metabolism           | 1.48E-06 | 2.19               |
| SAUSA300 1630     | dnal    | Primosomal protein dnal                                     | Replication, recombination and repair         | 4.82E-09 | -2.52              |
| SAUSA300 1633     | gap     | Glyceraldehyde 3-phosphate dehydrogenase (EC 1.2.1.12)      | Carbohydrate transport and metabolism         | 6.17E-07 | -3.28              |
| SAUSA300 1637     | -       | Glucosyltransferase (side chain biosynthesis) (EC 2.4.1.-)  | ---                                           | 2.72E-05 | 5.51               |
| SAUSA300 1638     | phoR    | Phosphate regulon sensor protein phoR (EC 2.7.3.-)          | Signal transduction mechanisms                | 1.34E-09 | -3.98              |
| SAUSA300 1639     | phoP    | Alkaline phosphatase synthesis two-component response r     | Signal transduction mechanisms                | 5.20E-07 | -4.43              |
| SAUSA300 1650     | -       | Phosphoesterase, DHH family protein                         | General function prediction only              | 1.77E-09 | -3.43              |
| SAUSA300 1651     | -       | Cytosolic protein containing multiple CBS domains           | Transcription                                 | 1.05E-05 | -2.19              |
| SAUSA300 1652     | -       | Putative transcription factors                              | Signal transduction mechanisms                | 6.15E-05 | -2.79              |
| SAUSA300 1653     | -       | Metal-dependent hydrolase (EC 3.-.-.-)                      | General function prediction only              | 1.05E-06 | -2.69              |
| SAUSA300 1654     | -       | Xaa-Pro aminopeptidase (EC 3.4.11.9)                        | Amino acid transport and metabolism           | 6.17E-08 | 2.01               |
| SAUSA300 1655     | ald     | Alanine dehydrogenase (EC 1.4.1.1)                          | Amino acid transport and metabolism           | 1.36E-06 | -3.29              |
| SAUSA300 1657     | ackA    | Acetate kinase (EC 2.7.2.1)                                 | Energy production and conversion              | 8.18E-03 | -2.01              |
| SAUSA300 1661     | thiI    | Thiamine biosynthesis protein thiI                          | Coenzyme transport and metabolism             | 8.04E-05 | 4.37               |
| SAUSA300 1662     | -       | Cysteine desulfurase (EC 2.8.1.7) / Selenocysteine lyase (  | Amino acid transport and metabolism           | 2.80E-06 | 5.57               |
| SAUSA300 1664     | ezrA    | Septation ring formation regulator                          | Cell cycle control, mitosis and meiosis       | 6.35E-06 | -2.39              |
| SAUSA300 1667     | -       | Glycerophosphoryl diester phosphodiesterase (EC 3.1.4.4)    | Energy production and conversion              | 9.15E-05 | 7.33               |
| SAUSA300 1670     | serA    | D-3-phosphoglycerate dehydrogenase (EC 1.1.1.95)            | Coenzyme transport and metabolism             | 5.29E-05 | 7.05               |
| SAUSA300 1671     | -       | HPR(SER) KINASE (EC 2.7.1.-) / PHOSPHATASE (EC 3.1.1.1)     | General function prediction only              | 6.42E-05 | 3.17               |
| SAUSA300 1673     | -       | 1-acyl-sn-glycerol-3-phosphate acyltransferase (EC 2.3.1.1) | ---                                           | 4.17E-03 | 7.07               |
| SAUSA300 1674     | -       | Endopeptidase degP (EC 3.4.21.-)                            | Posttranslational modification, protein turno | 1.57E-02 | 6.46               |
| SAUSA300 1675     | tyrS    | Tyrosyl-tRNA synthetase (EC 6.1.1.1)                        | Translation                                   | 1.04E-03 | 6.36               |
| SAUSA300 1677     | -       | Fibronectin-binding protein                                 | ---                                           | 2.63E-03 | -3.35              |
| SAUSA300 1679     | acsA    | Acetyl-coenzyme A synthetase (EC 6.2.1.1)                   | Lipid transport and metabolism                | 5.07E-06 | -9.80              |
| SAUSA300 1680     | acuA    | Acetoin utilization protein acuA (EC 2.3.1.-)               | ---                                           | 8.50E-05 | 2.59               |
| SAUSA300 1684     | -       | Hypothetical exported protein                               | ---                                           | 3.29E-07 | -3.72              |
| SAUSA300 1685     | -       | General stress protein                                      | ---                                           | 9.13E-12 | -4.64              |
| SAUSA300 1687     | -       | Cell division protein ftsK                                  | Cell cycle control, mitosis and meiosis       | 1.16E-04 | -7.38              |
| SAUSA300 1688     | -       | tRNA binding domain protein                                 | General function prediction only              | 9.90E-06 | -2.15              |
| SAUSA300 1692     | -       | Hypothetical protein                                        | Function unknown                              | 6.36E-07 | -3.27              |
| SAUSA300 1693     | -       | Metal-dependent hydrolase (EC 3.-.-.-)                      | General function prediction only              | 4.56E-08 | 2.12               |
| SAUSA300 1698     | -       | Hypothetical protein                                        | ---                                           | 5.33E-12 | -4.67              |
| SAUSA300 1702     | -       | Extracellular matrix binding protein                        | ---                                           | 5.80E-10 | 10.98              |
| SAUSA300 1703     | -       | Rhodanese-related sulfurtransferases                        | Inorganic ion transport and metabolism        | 1.13E-02 | 3.55               |
| SAUSA300 1704     | leuS    | Leucyl-tRNA synthetase (EC 6.1.1.4)                         | Translation                                   | 2.58E-04 | 5.37               |
| SAUSA300 1711     | putA    | Proline dehydrogenase (EC 1.5.99.8)                         | Amino acid transport and metabolism           | 3.00E-05 | -9.18              |
| SAUSA300 1712     | ribH    | 6,7-dimethyl-8-ribityllumazine synthase (EC 2.5.1.9)        | Coenzyme transport and metabolism             | 5.09E-03 | 5.92               |
| SAUSA300 1715     | ribD    | Diaminohydroxyphosphoribosylaminopyrimidine deamin          | Coenzyme transport and metabolism             | 2.58E-03 | 3.95               |
| SAUSA300 1722     | -       | Hypothetical protein                                        | Transcription                                 | 7.80E-05 | 5.64               |
| SAUSA300 1731     | pckA    | Phosphoenolpyruvate carboxykinase [ATP] (EC 4.1.1.49)       | Energy production and conversion              | 2.40E-09 | -2.50              |
| SAUSA300 1736     | -       | Hypothetical cytosolic protein                              | Function unknown                              | 8.98E-03 | 4.72               |
| SAUSA300 1738     | -       | Hypothetical protein                                        | ---                                           | 1.35E-10 | 4.37               |
| SAUSA300 1739     | -       | Endonuclease (EC 3.1.-.-)                                   | ---                                           | 2.80E-11 | -7.69              |
| SAUSA300 1740     | -       | Hypothetical protein                                        | ---                                           | 3.54E-14 | -7.58              |
| SAUSA300 1741     | -       | Hypothetical protein                                        | ---                                           | 3.84E-05 | 2.42               |
| SAUSA300 1747     | -       | Hypothetical protein                                        | ---                                           | 1.96E-04 | 5.14               |
| SAUSA300 1750     | -       | Hypothetical protein                                        | ---                                           | 1.62E-04 | 5.29               |
| SAUSA300 1751     | hsdS    | Type I restriction-modification system specificity subunit  | Defense mechanisms/Virulence                  | 3.02E-03 | 2.24               |
| SAUSA300 1753     | splF    | Serine protease (EC 3.4.21.-)                               | ---                                           | 1.10E-03 | 4.40               |
| SAUSA300 1754     | splE    | Serine protease (EC 3.4.21.-)                               | ---                                           | 1.48E-02 | 10.81              |
| SAUSA300 1755     | splD    | Serine protease (EC 3.4.21.-)                               | ---                                           | 5.42E-03 | 7.03               |
| SAUSA300 1756     | splC    | Serine protease (EC 3.4.21.-)                               | ---                                           | 2.53E-03 | 8.10               |
| SAUSA300 1757     | splB    | Serine protease (EC 3.4.21.-)                               | ---                                           | 3.06E-03 | 17.60              |
| SAUSA300 1760     | epiG    | EPIDERMIS RESISTANCE TRANSMEMBRANE PRO                      | ---                                           | 2.17E-12 | -22.86             |
| SAUSA300 1761     | epiE    | Lantibiotic transport permease protein                      | ---                                           | 2.09E-13 | -9.62              |
| SAUSA300 1762     | epiF    | Lantibiotic transport ATP-binding protein                   | Defense mechanisms/Virulence                  | 7.10E-11 | -6.28              |
| SAUSA300 1763     | epiP    | Epidermin leader peptide processing serine protease EPIP    | Posttranslational modification, protein turno | 2.52E-03 | 5.64               |
| SAUSA300 1765     | epiC    | Lanthionine synthetase (lantibiotic biosynthesis)           | ---                                           | 9.37E-05 | 9.19               |
| SAUSA300 1766     | epiB    | Serine (threonine) dehydratase (lantibiotic biosynthesis)   | ---                                           | 8.10E-06 | 2.52               |
| SAUSA300 1767     | epiA    | Lantibiotic gallidermin                                     | ---                                           | 4.74E-08 | -3.22              |
| SAUSA300 1768     | lukD    | Hypothetical protein                                        | ---                                           | 4.01E-07 | 3.58               |
| SAUSA300 1769     | lukE    | Leukocidin S subunit                                        | ---                                           | 3.21E-08 | 25.10              |

| probe set mapping | synonym | description                                               | NCBI COG                                      | p-value  | day one / inoculum |
|-------------------|---------|-----------------------------------------------------------|-----------------------------------------------|----------|--------------------|
| SAUSA300_1771     | -       | Hypothetical protein                                      | ---                                           | 1.90E-07 | -2.18              |
| SAUSA300_1783     | hemE    | Uroporphyrinogen decarboxylase (EC 4.1.1.37)              | Coenzyme transport and metabolism             | 3.20E-02 | 2.24               |
| SAUSA300_1788     | -       | Hypothetical protein                                      | General function prediction only              | 6.08E-12 | -4.81              |
| SAUSA300_1789     | -       | Hypothetical protein                                      | ---                                           | 2.55E-06 | -3.33              |
| SAUSA300_1790     | prsA    | Peptidyl-prolyl cis-trans isomerase (EC 5.2.1.8)          | Posttranslational modification, protein turno | 2.36E-08 | 24.28              |
| SAUSA300_1792     | -       | Hypothetical membrane associated protein                  | Function unknown                              | 6.50E-05 | -5.76              |
| SAUSA300_1794     | -       | Hypothetical protein                                      | ---                                           | 6.21E-05 | 28.09              |
| SAUSA300_1795     | -       | Hypothetical cytosolic protein                            | Function unknown                              | 1.94E-03 | -2.38              |
| SAUSA300_1798     | -       | Hypothetical protein                                      | Signal transduction mechanisms                | 2.49E-05 | -2.26              |
| SAUSA300_1804     | -       | Hypothetical protein                                      | Carbohydrate transport and metabolism         | 9.25E-11 | -3.78              |
| SAUSA300_1807     | -       | Arginine transport ATP-binding protein artP               | Amino acid transport and metabolism           | 2.70E-06 | 3.34               |
| SAUSA300_1808     | -       | Arginine-binding protein / Arginine transport system perm | Amino acid transport and metabolism           | 3.37E-11 | 35.33              |
| SAUSA300_1810     | -       | Transposase                                               | Replication, recombination and repair         | 5.03E-11 | 7.28               |
| SAUSA300_1851     | -       | Hypothetical protein                                      | ---                                           | 5.70E-08 | -16.76             |
| SAUSA300_1856     | -       | PROTEASE I (EC 3.4.-.-)                                   | General function prediction only              | 7.63E-07 | -3.34              |
| SAUSA300_1858     | -       | Thioredoxin-like oxidoreductases                          | General function prediction only              | 2.96E-03 | 3.53               |
| SAUSA300_1861     | -       | Hypothetical protein                                      | Function unknown                              | 1.86E-02 | -4.74              |
| SAUSA300_1862     | -       | Protein tyrosine phosphatase (EC 3.1.3.48)                | Signal transduction mechanisms                | 9.60E-12 | -2.99              |
| SAUSA300_1863     | -       | Hypothetical protein                                      | ---                                           | 2.00E-11 | -2.51              |
| SAUSA300_1864     | -       | Ribonuclease BN (EC 3.1.-.-)                              | Function unknown                              | 9.11E-12 | -26.61             |
| SAUSA300_1866     | vraS    | Two-component sensor protein yvqE (EC 2.7.3.-)            | Signal transduction mechanisms                | 1.31E-02 | 8.37               |
| SAUSA300_1867     | -       | Transporter yvqF                                          | Function unknown                              | 3.02E-04 | 7.80               |
| SAUSA300_1868     | -       | Hypothetical protein                                      | ---                                           | 3.51E-02 | 5.97               |
| SAUSA300_1869     | map     | Methionine aminopeptidase (EC 3.4.11.18)                  | Translation                                   | 8.34E-05 | -2.24              |
| SAUSA300_1873     | -       | UDP-N-acetylmuramoylalanyl-D-glutamate--2,6-diamino       | ---                                           | 5.75E-04 | -7.79              |
| SAUSA300_1874     | -       | Ferritin                                                  | Inorganic ion transport and metabolism        | 1.66E-03 | -2.27              |
| SAUSA300_1876     | -       | DNA polymerase IV (EC 2.7.7.7)                            | Replication, recombination and repair         | 9.28E-04 | 7.18               |
| SAUSA300_1877     | -       | Permease                                                  | ---                                           | 2.04E-02 | 11.49              |
| SAUSA300_1881     | gatA    | Aspartyl/glutamyl-tRNA(Asn/Gln) amidotransferase subu     | Translation                                   | 3.21E-02 | -6.40              |
| SAUSA300_1887     | perB    | GERANYLGERANYLGLYCERYL DIPHOSPHATE SY                     | General function prediction only              | 1.70E-03 | 2.47               |
| SAUSA300_1890     | -       | Staphopain (EC 3.4.22.-)                                  | ---                                           | 9.11E-14 | 62.49              |
| SAUSA300_1894     | -       | Nicotinate phosphoribosyltransferase (EC 2.4.2.11)        | Coenzyme transport and metabolism             | 1.09E-04 | 3.82               |
| SAUSA300_1896     | pheA    | Prephenate dehydratase (EC 4.2.1.51)                      | Amino acid transport and metabolism           | 2.24E-06 | -2.28              |
| SAUSA300_1897     | -       | Transporter, Divalent Anion:Sodium Symporter family       | Inorganic ion transport and metabolism        | 6.62E-05 | -2.23              |
| SAUSA300_1906     | -       | Hypothetical protein                                      | ---                                           | 2.58E-07 | -2.74              |
| SAUSA300_1908     | -       | Hypothetical protein                                      | ---                                           | 9.90E-06 | -2.89              |
| SAUSA300_1910     | -       | Hypothetical protein                                      | ---                                           | 4.32E-11 | -2.07              |
| SAUSA300_1915     | -       | Hypothetical protein                                      | ---                                           | 3.40E-05 | -6.11              |
| SAUSA300_1920     | chs     | Hypothetical protein                                      | ---                                           | 1.39E-13 | 34.49              |
| SAUSA300_1923     | -       | CHAP domain containing protein                            | ---                                           | 5.75E-09 | 11.44              |
| SAUSA300_1924     | -       | Holin                                                     | ---                                           | 2.84E-07 | 16.67              |
| SAUSA300_1925     | -       | Phage protein                                             | ---                                           | 3.31E-06 | 6.18               |
| SAUSA300_1926     | -       | Hypothetical protein                                      | ---                                           | 1.63E-02 | 2.14               |
| SAUSA300_1927     | -       | Hypothetical protein                                      | ---                                           | 3.39E-02 | 35.01              |
| SAUSA300_1928     | -       | Phage-related protein                                     | ---                                           | 2.35E-05 | 8.18               |
| SAUSA300_1929     | -       | Phage-related protein                                     | ---                                           | 1.99E-07 | 26.90              |
| SAUSA300_1930     | -       | Hypothetical protein                                      | Function unknown                              | 1.99E-09 | 6.02               |
| SAUSA300_1941     | -       | Terminase large subunit                                   | General function prediction only              | 1.01E-06 | 5.66               |
| SAUSA300_1942     | -       | Phage-related protein                                     | ---                                           | 1.75E-07 | 14.07              |
| SAUSA300_1943     | -       | HNH endonuclease family protein                           | Defense mechanisms/Virulence                  | 7.91E-03 | 19.93              |
| SAUSA300_1944     | -       | Hypothetical protein                                      | ---                                           | 2.72E-02 | 7.75               |
| SAUSA300_1946     | -       | Transcriptional activator rinB                            | ---                                           | 2.20E-09 | 3.22               |
| SAUSA300_1949     | dut     | Deoxyuridine 5'-triphosphate nucleotidohydrolase (EC 3.6  | Nucleotide transport and metabolism           | 1.11E-05 | 3.19               |
| SAUSA300_1951     | -       | Phage protein                                             | ---                                           | 3.02E-04 | 6.65               |
| SAUSA300_1952     | -       | Hypothetical protein                                      | ---                                           | 3.90E-03 | 4.71               |
| SAUSA300_1954     | -       | Phage protein                                             | ---                                           | 1.63E-02 | 5.27               |
| SAUSA300_1963     | -       | Hypothetical cytosolic protein                            | ---                                           | 2.00E-02 | 2.03               |
| SAUSA300_1966     | -       | Phage antirepressor protein                               | Function unknown                              | 1.30E-03 | -3.23              |
| SAUSA300_1967     | -       | Phage protein                                             | ---                                           | 2.10E-04 | 2.78               |
| SAUSA300_1969     | -       | Phage transcriptional repressor                           | Transcription                                 | 4.10E-03 | 2.99               |
| SAUSA300_1971     | -       | Phage protein                                             | ---                                           | 6.72E-05 | 2.40               |
| SAUSA300_1972     | int     | DNA integration/recombination/inversion protein           | Replication, recombination and repair         | 1.25E-08 | 19.46              |
| SAUSA300_1973     | -       | Sphingomyelin phosphodiesterase (EC 3.1.4.12)             | General function prediction only              | 3.25E-07 | 40.16              |
| SAUSA300_1976     | -       | Succinyl-diaminopimelate desuccinylase (EC 3.5.1.18)      | Amino acid transport and metabolism           | 3.32E-06 | -8.82              |
| SAUSA300_1977     | -       | Tetracenomycin polyketide synthesis O-methyltransferase   | Secondary metabolites biosynthesis, transpo   | 5.49E-11 | 67.76              |
| SAUSA300_1978     | -       | Ferrichrome-binding protein / Ferrioxamine B binding pro  | Inorganic ion transport and metabolism        | 7.56E-13 | 86.08              |
| SAUSA300_1979     | -       | Potassium uptake protein ktrB                             | Inorganic ion transport and metabolism        | 1.81E-12 | 7.68               |
| SAUSA300_1980     | -       | Acetyltransferase (EC 2.3.1.-)                            | ---                                           | 2.01E-06 | -3.18              |
| SAUSA300_1981     | -       | Phage Terminase Small Subunit                             | Replication, recombination and repair         | 1.85E-09 | 47.75              |
| SAUSA300_1982     | groEL   | 60 kDa chaperonin GROEL                                   | Posttranslational modification, protein turno | 7.80E-07 | 9.96               |
| SAUSA300_1983     | groES   | 10 kDa chaperonin GROES                                   | Posttranslational modification, protein turno | 1.31E-05 | 19.54              |
| SAUSA300_1987     | -       | Beta-ureidopropionase (EC 3.5.1.6)                        | General function prediction only              | 1.33E-07 | -9.59              |
| SAUSA300_1989     | agrB    | Accessory gene regulator protein B AGRB                   | Posttranslational modification, protein turno | 6.10E-10 | -8.57              |
| SAUSA300_1991     | agrC    | Sensory transduction histidine kinase AgrC (EC 2.7.3.-)   | Signal transduction mechanisms                | 2.98E-09 | -9.91              |
| SAUSA300_1992     | agrA    | Accessory gene regulator protein A AGRA                   | ---                                           | 8.83E-11 | -19.77             |
| SAUSA300_1993     | -       | Fructokinase (EC 2.7.1.4)                                 | Carbohydrate transport and metabolism         | 3.07E-02 | 3.35               |
| SAUSA300_1996     | amt     | Hypothetical protein                                      | Inorganic ion transport and metabolism        | 1.51E-07 | 10.21              |
| SAUSA300_1998     | -       | putative transport system permease protein                | General function prediction only              | 5.35E-07 | 2.51               |
| SAUSA300_2001     | -       | DNA mismatch repair protein mutS                          | Replication, recombination and repair         | 2.47E-05 | 14.67              |
| SAUSA300_2004     | -       | Non-proteolytic protein, peptidase family M22             | Posttranslational modification, protein turno | 9.82E-04 | 3.67               |

| probe set mapping | synonym | description                                                | NCBI COG                                | p-value  | day one / inoculum |
|-------------------|---------|------------------------------------------------------------|-----------------------------------------|----------|--------------------|
| SAUSA300_2007     | ilvB    | Acetolactate synthase large subunit (EC 2.2.1.6)           | Amino acid transport and metabolism     | 2.43E-05 | 2.21               |
| SAUSA300_2009     | ilvC    | Ketol-acid reductoisomerase (EC 1.1.1.86) / 2-dehydropan   | Amino acid transport and metabolism     | 1.15E-04 | 5.81               |
| SAUSA300_2010     | leuA    | 2-isopropylmalate synthase (EC 2.3.3.13)                   | Amino acid transport and metabolism     | 1.06E-04 | 3.98               |
| SAUSA300_2011     | leuB    | 3-isopropylmalate dehydrogenase (EC 1.1.1.85)              | Energy production and conversion        | 5.16E-04 | 3.58               |
| SAUSA300_2012     | leuC    | 3-isopropylmalate dehydratase large subunit (EC 4.2.1.33)  | Amino acid transport and metabolism     | 7.98E-09 | 8.47               |
| SAUSA300_2013     | leuD    | 3-isopropylmalate dehydratase small subunit (EC 4.2.1.33)  | Amino acid transport and metabolism     | 3.52E-11 | 19.47              |
| SAUSA300_2014     | ilvA    | Threonine dehydratase (EC 4.3.1.19)                        | Amino acid transport and metabolism     | 1.03E-04 | 2.24               |
| SAUSA300_2020     | -       | Metallopeptidase, SprT family (EC 3.4.24.-)                | Function unknown                        | 1.36E-04 | -5.71              |
| SAUSA300_2022     | rpoF    | RNA polymerase sigma-B factor                              | ---                                     | 4.09E-06 | -4.47              |
| SAUSA300_2023     | rsbW    | Anti-sigma B factor                                        | Signal transduction mechanisms          | 3.61E-09 | -2.18              |
| SAUSA300_2024     | rsbV    | Anti-sigma B factor antagonist                             | Signal transduction mechanisms          | 3.89E-08 | -2.45              |
| SAUSA300_2032     | kdpC    | Potassium-transporting ATPase C chain (EC 3.6.3.12)        | Inorganic ion transport and metabolism  | 1.57E-09 | 16.22              |
| SAUSA300_2033     | kdpB    | Potassium-transporting ATPase B chain (EC 3.6.3.12)        | Inorganic ion transport and metabolism  | 4.92E-11 | 15.60              |
| SAUSA300_2034     | kdpA    | Potassium-transporting ATPase A chain (EC 3.6.3.12)        | Inorganic ion transport and metabolism  | 4.47E-05 | 22.16              |
| SAUSA300_2035     | kdpD    | Sensor protein kdpD (EC 2.7.3.-)                           | Signal transduction mechanisms          | 2.42E-03 | 6.93               |
| SAUSA300_2045     | -       | Metal dependent hydrolase                                  | General function prediction only        | 2.80E-10 | -5.17              |
| SAUSA300_2048     | thiM    | Hydroxyethylthiazole kinase (EC 2.7.1.50)                  | Coenzyme transport and metabolism       | 5.07E-09 | 30.65              |
| SAUSA300_2049     | thiD    | Phosphomethylpyrimidine kinase (EC 2.7.4.7) / Hydroxy      | Coenzyme transport and metabolism       | 3.35E-12 | 40.50              |
| SAUSA300_2050     | -       | Transcriptional activator tenA                             | Transcription                           | 2.47E-06 | 5.56               |
| SAUSA300_2051     | -       | SCED PRECURSOR                                             | ---                                     | 6.23E-11 | 17.92              |
| SAUSA300_2052     | -       | Single-strand DNA binding protein                          | Replication, recombination and repair   | 1.40E-02 | -2.26              |
| SAUSA300_2054     | fabZ    | (3R)-hydroxyacyl-[acyl carrier protein] dehydratase (EC 4  | Lipid transport and metabolism          | 2.38E-15 | -2.63              |
| SAUSA300_2055     | murA    | UDP-N-acetylglucosamine 1-carboxyvinyltransferase (EC      | Cell wall/membrane biogenesis           | 1.81E-07 | -2.56              |
| SAUSA300_2056     | -       | Hypothetical membrane associated protein                   | Function unknown                        | 2.46E-09 | -8.25              |
| SAUSA300_2058     | atpD    | ATP synthase beta chain (EC 3.6.3.14)                      | Energy production and conversion        | 6.96E-08 | -7.99              |
| SAUSA300_2059     | atpG    | ATP synthase gamma chain (EC 3.6.3.14)                     | Energy production and conversion        | 4.90E-05 | -2.79              |
| SAUSA300_2060     | atpA    | ATP synthase alpha chain (EC 3.6.3.14)                     | Energy production and conversion        | 7.32E-08 | -2.31              |
| SAUSA300_2064     | atpB    | ATP synthase A chain (EC 3.6.3.14)                         | Energy production and conversion        | 6.94E-04 | -2.55              |
| SAUSA300_2065     | -       | UDP-N-acetylglucosamine 2-epimerase (EC 5.1.3.14)          | Cell wall/membrane biogenesis           | 4.09E-06 | -2.63              |
| SAUSA300_2069     | -       | Protein tyrosine phosphatase (EC 3.1.3.48)                 | Signal transduction mechanisms          | 1.43E-03 | 2.33               |
| SAUSA300_2072     | prfA    | Bacterial Peptide Chain Release Factor 1 (RF-1)            | Translation                             | 7.79E-09 | -3.35              |
| SAUSA300_2075     | rho     | Transcription termination factor rho                       | Transcription                           | 4.79E-06 | -3.04              |
| SAUSA300_2076     | -       | Aldehyde dehydrogenase (EC 1.2.1.3)                        | Energy production and conversion        | 4.89E-11 | -2.15              |
| SAUSA300_2077     | -       | Transcriptional regulator, MarR family                     | Transcription                           | 6.29E-04 | -2.76              |
| SAUSA300_2080     | -       | Hypothetical protein                                       | ---                                     | 2.53E-04 | 3.49               |
| SAUSA300_2087     | -       | Peptidase family M20/M25/M40                               | General function prediction only        | 2.44E-06 | 5.83               |
| SAUSA300_2095     | -       | Hypothetical protein                                       | ---                                     | 9.15E-09 | -5.04              |
| SAUSA300_2096     | manA    | Mannose-6-phosphate isomerase (EC 5.3.1.8)                 | Carbohydrate transport and metabolism   | 1.67E-06 | -2.01              |
| SAUSA300_2097     | -       | Putative NAD-dependent dehydrogenase                       | Cell wall/membrane biogenesis           | 2.61E-11 | -4.15              |
| SAUSA300_2104     | glmS    | Glucosamine-fructose-6-phosphate aminotransferase [iso     | Cell wall/membrane biogenesis           | 2.52E-04 | -2.77              |
| SAUSA300_2105     | mtlF    | PTS system, mannitol-specific IIBC component (EC 2.7.1     | Carbohydrate transport and metabolism   | 2.34E-04 | 3.00               |
| SAUSA300_2106     | -       | Transcription antiterminator, BglG family / PTS system, n  | Transcription                           | 6.62E-05 | -2.48              |
| SAUSA300_2107     | mtlA    | PTS system, mannitol-specific IIA component (EC 2.7.1.6    | Carbohydrate transport and metabolism   | 3.10E-15 | -55.06             |
| SAUSA300_2108     | mtlD    | Mannitol-1-phosphate 5-dehydrogenase (EC 1.1.1.17)         | Carbohydrate transport and metabolism   | 5.89E-09 | -2.43              |
| SAUSA300_2109     | fntB    | Hypothetical protein                                       | ---                                     | 1.61E-09 | 42.52              |
| SAUSA300_2110     | fntB    | Methicillin resistance protein                             | ---                                     | 1.07E-11 | 38.24              |
| SAUSA300_2112     | -       | Hypothetical membrane associated protein                   | Function unknown                        | 7.92E-09 | -2.00              |
| SAUSA300_2114     | rocF    | Arginase (EC 3.5.3.1)                                      | Amino acid transport and metabolism     | 2.64E-04 | -2.16              |
| SAUSA300_2125     | -       | Iron-sulfur cluster assembly/repair protein ApbC           | Cell cycle control, mitosis and meiosis | 1.61E-03 | 4.42               |
| SAUSA300_2127     | -       | Hypothetical protein                                       | ---                                     | 2.72E-04 | -2.41              |
| SAUSA300_2129     | -       | Conserved membrane protein (hemolysin III homolog)         | General function prediction only        | 4.66E-06 | -4.37              |
| SAUSA300_2130     | -       | UDP-N-acetylglucosamine pyrophosphorylase (EC 2.7.7.2      | Carbohydrate transport and metabolism   | 6.42E-06 | -3.76              |
| SAUSA300_2131     | -       | Predicted membrane-bound metal-dependent hydrolase         | General function prediction only        | 7.67E-07 | -15.41             |
| SAUSA300_2133     | -       | Hypothetical membrane spanning protein                     | Function unknown                        | 2.81E-11 | 10.41              |
| SAUSA300_2134     | -       | Iron(III) dicitrate transport system permease protein fecD | Inorganic ion transport and metabolism  | 1.70E-07 | 5.58               |
| SAUSA300_2135     | -       | Ferrichrome transport system permease protein fluB         | Inorganic ion transport and metabolism  | 1.00E-11 | 27.36              |
| SAUSA300_2136     | -       | Iron(III) dicitrate-binding protein                        | Inorganic ion transport and metabolism  | 2.63E-03 | 12.57              |
| SAUSA300_2139     | -       | Macrolide-efflux protein                                   | ---                                     | 4.26E-06 | 9.15               |
| SAUSA300_2145     | -       | Glycine betaine transporter                                | Cell wall/membrane biogenesis           | 1.59E-09 | -4.19              |
| SAUSA300_2146     | -       | Hypothetical protein                                       | Energy production and conversion        | 1.58E-04 | 6.11               |
| SAUSA300_2149     | lacG    | 6-phospho-beta-galactosidase (EC 3.2.1.85)                 | Carbohydrate transport and metabolism   | 1.68E-12 | 5.32               |
| SAUSA300_2150     | lacE    | PTS system, lactose-specific IIBC component (EC 2.7.1.6    | Carbohydrate transport and metabolism   | 2.09E-11 | 54.02              |
| SAUSA300_2151     | lacF    | PTS system, lactose-specific IIA component (EC 2.7.1.69)   | Carbohydrate transport and metabolism   | 1.18E-02 | 3.14               |
| SAUSA300_2152     | lacD    | Tagatose-bisphosphate aldolase (EC 4.1.2.40)               | Carbohydrate transport and metabolism   | 1.69E-06 | 47.72              |
| SAUSA300_2153     | lacC    | Tagatose-6-phosphate kinase (EC 2.7.1.144)                 | Carbohydrate transport and metabolism   | 1.59E-13 | 25.72              |
| SAUSA300_2154     | lacB    | Galactose-6-phosphate isomerase lacB subunit (EC 5.3.1.2   | Carbohydrate transport and metabolism   | 2.25E-08 | 16.72              |
| SAUSA300_2155     | lacA    | Galactose-6-phosphate isomerase lacA subunit (EC 5.3.1.2   | Carbohydrate transport and metabolism   | 1.56E-10 | 4.92               |
| SAUSA300_2157     | -       | SIR2 family protein                                        | Transcription                           | 6.04E-03 | 5.04               |
| SAUSA300_2159     | -       | Morphine 6-dehydrogenase (EC 1.1.1.218)                    | General function prediction only        | 3.56E-03 | 2.36               |
| SAUSA300_2161     | hysA    | Hyaluronate lyase precursor (EC 4.2.2.1)                   | ---                                     | 1.15E-10 | 4.85               |
| SAUSA300_2162     | -       | Peptidoglycan-specific endopeptidase, M23 family           | ---                                     | 2.59E-06 | 2.17               |
| SAUSA300_2163     | -       | Hydrolase (HAD superfamily)                                | General function prediction only        | 6.99E-04 | 2.67               |
| SAUSA300_2164     | -       | Outer membrane protein                                     | ---                                     | 2.80E-13 | -12.38             |
| SAUSA300_2166     | aisS    | Acetolactate synthase (EC 2.2.1.6)                         | Amino acid transport and metabolism     | 1.76E-03 | 5.95               |
| SAUSA300_2172     | rplM    | LSU ribosomal protein L13P                                 | Translation                             | 2.90E-03 | -2.20              |
| SAUSA300_2174     | -       | Cobalt transport protein cbiQ                              | Inorganic ion transport and metabolism  | 7.67E-04 | -3.34              |
| SAUSA300_2186     | rplD    | LSU ribosomal protein L30P                                 | Translation                             | 5.22E-03 | 3.05               |
| SAUSA300_2191     | rpsN    | SSU ribosomal protein S14P                                 | Translation                             | 6.92E-04 | 2.01               |
| SAUSA300_2199     | rplV    | LSU ribosomal protein L22P                                 | Translation                             | 1.67E-06 | -5.46              |
| SAUSA300_2202     | rplW    | LSU ribosomal protein L23P                                 | Translation                             | 6.64E-10 | -2.39              |



| probe set mapping | synonym | description                                                         | NCBI COG                                      | p-value  | day one / inoculum |
|-------------------|---------|---------------------------------------------------------------------|-----------------------------------------------|----------|--------------------|
| SAUSA300_2211     | -       | Permease                                                            | General function prediction only              | 3.08E-08 | 10.62              |
| SAUSA300_2213     | -       | Acriflavin resistance plasma membrane protein                       | Defense mechanisms/Virulence                  | 7.88E-05 | 2.72               |
| SAUSA300_2214     | -       | UDP-N-acetylmuramoylpentapeptide-lysine N(6)-glycyltr               | Defense mechanisms/Virulence                  | 3.88E-04 | -8.76              |
| SAUSA300_2215     | -       | Hypothetical cytosolic protein                                      | ---                                           | 2.46E-04 | 2.22               |
| SAUSA300_2216     | -       | Transcriptional regulator, MarR family                              | Transcription                                 | 1.85E-04 | 10.43              |
| SAUSA300_2218     | -       | STAPHYLOCOCCAL ACCESSORY REGULATOR A                                | ---                                           | 4.04E-08 | 6.38               |
| SAUSA300_2219     | moaA    | Molybdenum cofactor biosynthesis protein A                          | Coenzyme transport and metabolism             | 2.57E-04 | -5.16              |
| SAUSA300_2225     | moaC    | Molybdenum cofactor biosynthesis protein C                          | Coenzyme transport and metabolism             | 1.22E-06 | -3.36              |
| SAUSA300_2227     | moeB    | Molybdopterin biosynthesis MoeB protein                             | Coenzyme transport and metabolism             | 4.01E-03 | -2.02              |
| SAUSA300_2234     | -       | Inosine-uridine preferring nucleoside hydrolase (EC 3.2.2           | Nucleotide transport and metabolism           | 1.35E-03 | 18.49              |
| SAUSA300_2235     | -       | Ferrichrome-binding protein / Ferrioxamine B binding pro            | Inorganic ion transport and metabolism        | 9.98E-10 | 6.31               |
| SAUSA300_2237     | -       | UREA TRANSPORTER                                                    | Amino acid transport and metabolism           | 1.65E-03 | 4.04               |
| SAUSA300_2239     | ureB    | Urease beta subunit (EC 3.5.1.5)                                    | Amino acid transport and metabolism           | 1.04E-03 | 24.03              |
| SAUSA300_2242     | ureF    | Urease accessory protein ureF                                       | Posttranslational modification, protein turno | 1.02E-03 | 8.30               |
| SAUSA300_2249     | ssaA    | Secretory antigen precursor SsaA                                    | ---                                           | 1.28E-02 | 2.66               |
| SAUSA300_2250     | nhaC    | Na <sup>+</sup> /H <sup>+</sup> antiporter nhaC                     | Energy production and conversion              | 5.98E-07 | 3.25               |
| SAUSA300_2254     | -       | Glyoxylate reductase (NADP <sup>+</sup> ) (EC 1.1.1.79) / Glyoxylat | Energy production and conversion              | 1.48E-08 | -4.81              |
| SAUSA300_2255     | -       | Salicylate hydroxylase (EC 1.14.13.1)                               | Coenzyme transport and metabolism             | 3.29E-03 | 3.51               |
| SAUSA300_2257     | -       | Hypothetical protein                                                | Function unknown                              | 3.37E-14 | -19.05             |
| SAUSA300_2258     | -       | Formate dehydrogenase alpha chain (EC 1.2.1.2)                      | General function prediction only              | 9.83E-13 | -5.08              |
| SAUSA300_2260     | -       | Myo-inositol-1(or 4)-monophosphatase (EC 3.1.3.25)                  | Carbohydrate transport and metabolism         | 1.97E-11 | -4.47              |
| SAUSA300_2263     | -       | Transposase                                                         | Replication, recombination and repair         | 4.79E-13 | 24.30              |
| SAUSA300_2264     | -       | Transcriptional regulator, RpiR family                              | Transcription                                 | 6.38E-10 | -3.36              |
| SAUSA300_2268     | -       | Transporter, Sodium/bile acid symporter family                      | General function prediction only              | 5.01E-06 | 3.61               |
| SAUSA300_2270     | glvC    | PTS system, maltose and glucose-specific IIBC componen              | Carbohydrate transport and metabolism         | 5.36E-03 | 3.01               |
| SAUSA300_2273     | -       | Na <sup>+</sup> /H <sup>+</sup> antiporter nhaC                     | Energy production and conversion              | 4.29E-04 | 3.39               |
| SAUSA300_2277     | hutI    | Imidazolonepropionase (EC 3.5.2.7)                                  | Secondary metabolites biosynthesis, transpo   | 2.48E-08 | -16.13             |
| SAUSA300_2280     | fosB    | Fosfomycin resistance protein                                       | ---                                           | 1.44E-04 | 7.13               |
| SAUSA300_2281     | hutG    | Formiminoglutamase (EC 3.5.3.8)                                     | Amino acid transport and metabolism           | 4.56E-09 | -6.37              |
| SAUSA300_2282     | -       | Hypothetical protein                                                | General function prediction only              | 4.66E-07 | -2.53              |
| SAUSA300_2290     | -       | DNA-3-methyladenine glycosylase II (EC 3.2.2.21)                    | Replication, recombination and repair         | 1.73E-02 | 6.64               |
| SAUSA300_2291     | gltS    | Sodium/glutamate symport carrier protein                            | Amino acid transport and metabolism           | 8.41E-10 | 6.76               |
| SAUSA300_2298     | -       | Multidrug resistance protein B                                      | ---                                           | 4.63E-10 | 12.21              |
| SAUSA300_2299     | -       | Multidrug resistance protein A                                      | Defense mechanisms/Virulence                  | 5.26E-11 | 37.02              |
| SAUSA300_2304     | -       | EpiH/GdmH-related protein                                           | Function unknown                              | 3.80E-09 | 3.50               |
| SAUSA300_2305     | -       | Transposase                                                         | ---                                           | 8.03E-05 | 32.53              |
| SAUSA300_2306     | -       | ABC transporter ATP-binding protein                                 | Defense mechanisms/Virulence                  | 3.85E-12 | 33.30              |
| SAUSA300_2307     | -       | ABC transporter permease protein                                    | Defense mechanisms/Virulence                  | 2.91E-05 | 8.85               |
| SAUSA300_2313     | -       | L-lactate permease                                                  | Energy production and conversion              | 4.04E-07 | -2.79              |
| SAUSA300_2316     | -       | Protease synthase and sporulation negative regulatory prot          | General function prediction only              | 1.18E-09 | 3.43               |
| SAUSA300_2321     | -       | Phage infection protein                                             | Function unknown                              | 1.16E-06 | 12.81              |
| SAUSA300_2325     | -       | Hypothetical protein                                                | ---                                           | 5.11E-09 | -2.14              |
| SAUSA300_2327     | -       | General stress protein 26                                           | ---                                           | 2.07E-12 | -4.27              |
| SAUSA300_2331     | -       | Transcriptional regulator, MarR family                              | Transcription                                 | 1.22E-06 | -3.92              |
| SAUSA300_2333     | narK    | Nitrite extrusion protein                                           | Inorganic ion transport and metabolism        | 4.90E-04 | 3.32               |
| SAUSA300_2334     | -       | Hypothetical cytosolic protein                                      | Posttranslational modification, protein turno | 1.23E-07 | 16.27              |
| SAUSA300_2335     | -       | Hypothetical cytosolic protein                                      | Posttranslational modification, protein turno | 3.86E-11 | 5.55               |
| SAUSA300_2337     | -       | Two-component response regulator                                    | Signal transduction mechanisms                | 6.95E-07 | -8.94              |
| SAUSA300_2339     | -       | Transcriptional regulator                                           | Signal transduction mechanisms                | 1.36E-04 | -6.74              |
| SAUSA300_2340     | narI    | Respiratory nitrate reductase gamma chain (EC 1.7.99.4)             | Energy production and conversion              | 2.91E-04 | -3.28              |
| SAUSA300_2341     | narJ    | Respiratory nitrate reductase delta chain (EC 1.7.99.4)             | Energy production and conversion              | 6.54E-03 | 5.18               |
| SAUSA300_2342     | narH    | Respiratory nitrate reductase beta chain (EC 1.7.99.4)              | Energy production and conversion              | 2.05E-06 | 4.62               |
| SAUSA300_2343     | -       | Respiratory nitrate reductase alpha chain (EC 1.7.99.4)             | Energy production and conversion              | 8.02E-09 | 6.26               |
| SAUSA300_2345     | nirD    | Nitrite reductase [NAD(P)H] small subunit (EC 1.7.1.4)              | Inorganic ion transport and metabolism        | 1.62E-05 | 6.99               |
| SAUSA300_2346     | nirB    | Nitrite reductase [NAD(P)H] large subunit (EC 1.7.1.4)              | Energy production and conversion              | 1.66E-05 | 2.65               |
| SAUSA300_2348     | -       | Acetyltransferase (EC 2.3.1.-)                                      | General function prediction only              | 3.14E-08 | 2.92               |
| SAUSA300_2350     | -       | Hypothetical cytosolic protein                                      | Function unknown                              | 1.86E-03 | 2.73               |
| SAUSA300_2351     | -       | Hypothetical protein                                                | General function prediction only              | 7.15E-04 | 5.19               |
| SAUSA300_2356     | fmhA    | UDP-N-acetylmuramoylheptapeptide-glycine L-seryltrans               | Defense mechanisms/Virulence                  | 2.43E-09 | 6.82               |
| SAUSA300_2361     | -       | Hypothetical protein                                                | ---                                           | 8.19E-06 | 15.57              |
| SAUSA300_2364     | sbi     | IgG-binding protein SBI                                             | ---                                           | 2.57E-09 | 24.12              |
| SAUSA300_2365     | hlgA    | Leukocidin S subunit                                                | ---                                           | 5.72E-08 | 20.80              |
| SAUSA300_2366     | hlgC    | Leukocidin S subunit                                                | ---                                           | 2.42E-05 | 27.44              |
| SAUSA300_2367     | hlgB    | Hypothetical protein                                                | ---                                           | 8.33E-12 | 76.31              |
| SAUSA300_2368     | -       | BioX protein                                                        | ---                                           | 1.27E-06 | 10.64              |
| SAUSA300_2369     | -       | 6-carboxyhexanoate--CoA ligase (EC 6.2.1.14)                        | Coenzyme transport and metabolism             | 1.21E-07 | 6.42               |
| SAUSA300_2370     | -       | 8-amino-7-oxononanoate synthase (EC 2.3.1.47)                       | Coenzyme transport and metabolism             | 2.10E-04 | 4.70               |
| SAUSA300_2371     | bioB    | Biotin synthase (EC 2.8.1.6)                                        | Coenzyme transport and metabolism             | 3.57E-09 | 5.11               |
| SAUSA300_2372     | bioA    | Adenosylmethionine-8-amino-7-oxononanoate aminotrans                | Coenzyme transport and metabolism             | 1.04E-11 | 107.14             |
| SAUSA300_2373     | bioD    | Dethiobiotin synthetase (EC 6.3.3.3)                                | Coenzyme transport and metabolism             | 1.91E-09 | 45.91              |
| SAUSA300_2374     | -       | ABC transporter ATP-binding and permease protein                    | Defense mechanisms/Virulence                  | 2.41E-06 | 25.73              |
| SAUSA300_2375     | -       | ABC transporter ATP-binding and permease protein                    | Defense mechanisms/Virulence                  | 9.05E-06 | 25.58              |
| SAUSA300_2380     | -       | Transcriptional activator aarP                                      | Function unknown                              | 7.14E-04 | 7.25               |
| SAUSA300_2382     | -       | Phosphoesterase                                                     | General function prediction only              | 3.20E-03 | 2.05               |
| SAUSA300_2385     | -       | Amino acid permease                                                 | Amino acid transport and metabolism           | 1.86E-05 | 3.76               |
| SAUSA300_2387     | -       | dTDP-glucose 4,6-dehydratase (EC 4.2.1.46)                          | Cell wall/membrane biogenesis                 | 1.25E-07 | 10.25              |
| SAUSA300_2388     | panE    | 2-dehydropanoate 2-reductase (EC 1.1.1.169)                         | Coenzyme transport and metabolism             | 7.05E-04 | -3.11              |
| SAUSA300_2390     | opuCd   | Glycine betaine transport system permease protein                   | Amino acid transport and metabolism           | 2.37E-03 | 2.09               |
| SAUSA300_2393     | opuCa   | Glycine betaine transport ATP-binding protein                       | Amino acid transport and metabolism           | 2.76E-02 | 5.06               |
| SAUSA300_2396     | pnbA    | Para-nitrobenzyl esterase (EC 3.1.1.-)                              | Lipid transport and metabolism                | 3.29E-11 | -7.89              |

| probe set mapping | synonym | description                                                | NCBI COG                                         | p-value  | day one / inoculum |
|-------------------|---------|------------------------------------------------------------|--------------------------------------------------|----------|--------------------|
| SAUSA300_2398     | -       | ABC transporter permease protein                           | General function prediction only                 | 4.52E-11 | -3.98              |
| SAUSA300_2399     | -       | ABC transporter ATP-binding protein                        | General function prediction only                 | 1.30E-08 | -8.95              |
| SAUSA300_2401     | -       | RelE protein                                               | Function unknown                                 | 1.61E-02 | 7.48               |
| SAUSA300_2404     | -       | Ferredoxin-dependent glutamate synthase (EC 1.4.7.1)       | Amino acid transport and metabolism              | 2.71E-02 | -5.56              |
| SAUSA300_2406     | -       | Bicyclomycin resistance protein                            | ---                                              | 1.41E-05 | 6.80               |
| SAUSA300_2407     | -       | Nickel transport ATP-binding protein nike                  | Amino acid transport and metabolism              | 7.44E-04 | 3.13               |
| SAUSA300_2408     | -       | Nickel transport ATP-binding protein nikD                  | Amino acid transport and metabolism              | 6.46E-08 | 16.17              |
| SAUSA300_2409     | -       | Nickel transport system permease protein nikC              | Amino acid transport and metabolism              | 9.09E-16 | 21.23              |
| SAUSA300_2410     | -       | Nickel transport system permease protein nikB              | Amino acid transport and metabolism              | 1.66E-05 | 2.80               |
| SAUSA300_2411     | opp-1A  | Nickel-binding protein                                     | Amino acid transport and metabolism              | 2.66E-06 | 12.27              |
| SAUSA300_2412     | -       | Hypothetical protein                                       | Function unknown                                 | 4.68E-08 | 45.29              |
| SAUSA300_2413     | -       | Methyltransferase (EC 2.1.1.-)                             | General function prediction only                 | 1.46E-07 | 13.94              |
| SAUSA300_2414     | -       | Diaminopimelate epimerase (EC 5.1.1.7)                     | Amino acid transport and metabolism              | 7.96E-08 | 23.53              |
| SAUSA300_2415     | -       | Hypothetical protein                                       | ---                                              | 7.52E-12 | -2.59              |
| SAUSA300_2416     | -       | Hypothetical protein                                       | Lipid transport and metabolism                   | 6.38E-12 | -15.71             |
| SAUSA300_2418     | -       | Transposase                                                | Function unknown                                 | 4.66E-07 | -2.17              |
| SAUSA300_2420     | -       | Hypothetical protein                                       | ---                                              | 4.07E-04 | 24.89              |
| SAUSA300_2424     | -       | membrane lipoprotein                                       | ---                                              | 4.16E-10 | 25.11              |
| SAUSA300_2425     | -       | Hypothetical protein                                       | ---                                              | 1.37E-04 | 3.31               |
| SAUSA300_2430     | -       | membrane lipoprotein                                       | ---                                              | 1.65E-05 | 9.46               |
| SAUSA300_2431     | -       | DNA/RNA helicase (DEAD/DEAH box family)                    | Transcription                                    | 1.20E-05 | 3.03               |
| SAUSA300_2432     | -       | 7,8-dihydro-8-oxoguanine-triphosphatase (EC 3.6.1.-)       | Replication, recombination and repair            | 7.17E-05 | 2.48               |
| SAUSA300_2434     | -       | Macrolide-efflux protein                                   | ---                                              | 2.70E-10 | 3.69               |
| SAUSA300_2435     | -       | Beta-N-acetylhexosaminidase (EC 3.2.1.52)                  | Function unknown                                 | 1.80E-10 | 15.42              |
| SAUSA300_2436     | -       | Beta-N-acetylhexosaminidase (EC 3.2.1.52)                  | ---                                              | 9.23E-09 | 23.99              |
| SAUSA300_2438     | sarU    | STAPHYLOCOCCAL ACCESSORY REGULATOR A                       | ---                                              | 1.78E-05 | 3.69               |
| SAUSA300_2440     | fmbB    | Hypothetical protein                                       | ---                                              | 1.66E-11 | 23.61              |
| SAUSA300_2441     | fmbA    | Fibronectin-binding protein                                | ---                                              | 1.66E-08 | 2.30               |
| SAUSA300_2442     | gntP    | Gluconate permease                                         | Carbohydrate transport and metabolism            | 6.79E-08 | 4.64               |
| SAUSA300_2443     | gntK    | Gluconokinase (EC 2.7.1.12)                                | Carbohydrate transport and metabolism            | 8.81E-15 | 3.03               |
| SAUSA300_2451     | -       | Bicyclomycin resistance protein                            | ---                                              | 5.36E-04 | 8.07               |
| SAUSA300_2452     | -       | Transcriptional regulator, MarR family                     | Transcription                                    | 1.10E-03 | 23.47              |
| SAUSA300_2453     | -       | Lantibiotic transport ATP-binding protein                  | Defense mechanisms/Virulence                     | 5.82E-10 | 27.77              |
| SAUSA300_2454     | -       | ABC transporter ATP-binding protein                        | ---                                              | 1.73E-05 | 13.92              |
| SAUSA300_2456     | -       | Hypothetical membrane spanning protein                     | Function unknown                                 | 1.36E-02 | 4.67               |
| SAUSA300_2458     | -       | Glyoxalase family protein                                  | ---                                              | 6.18E-07 | 25.55              |
| SAUSA300_2460     | -       | Acetyltransferase (EC 2.3.1.-)                             | General function prediction only                 | 2.47E-11 | -3.40              |
| SAUSA300_2461     | -       | Glyoxalase family protein                                  | General function prediction only                 | 2.82E-04 | 6.56               |
| SAUSA300_2463     | ddh     | D-2-hydroxyacid dehydrogenase (EC 1.1.1.-)                 | Energy production and conversion                 | 1.48E-13 | -6.84              |
| SAUSA300_2464     | -       | Hydrolase (HAD superfamily)                                | General function prediction only                 | 1.39E-08 | 11.82              |
| SAUSA300_2465     | -       | ABC transporter ATP-binding protein                        | Defense mechanisms/Virulence                     | 2.42E-05 | 21.12              |
| SAUSA300_2466     | -       | Hypothetical membrane spanning protein                     | ---                                              | 2.19E-04 | 5.50               |
| SAUSA300_2468     | -       | Phosphothricin N-acetyltransferase (EC 2.3.1.-)            | ---                                              | 1.35E-02 | 2.90               |
| SAUSA300_2475     | -       | Thioesterase (EC 3.1.2.-)                                  | General function prediction only                 | 7.97E-06 | 8.76               |
| SAUSA300_2477     | cidC    | Pyruvate dehydrogenase [cytochrome] (EC 1.2.2.2)           | Amino acid transport and metabolism              | 1.20E-12 | -2.12              |
| SAUSA300_2478     | cidB    | Murein hydrolase export regulator                          | Cell wall/membrane biogenesis                    | 3.12E-12 | -3.01              |
| SAUSA300_2479     | cidA    | Murein hydrolase exporter                                  | General function prediction only                 | 7.12E-11 | 8.24               |
| SAUSA300_2481     | -       | Hypothetical cytosolic protein                             | ---                                              | 9.76E-13 | -12.25             |
| SAUSA300_2486     | -       | ATP-dependent endopeptidase clp ATP-binding subunit clp    | Posttranslational modification, protein turnover | 3.89E-05 | -3.07              |
| SAUSA300_2487     | feoB    | Ferrous iron transport protein B                           | Inorganic ion transport and metabolism           | 2.80E-07 | 5.33               |
| SAUSA300_2489     | -       | Transporter, MMPL family                                   | General function prediction only                 | 1.50E-13 | 90.27              |
| SAUSA300_2490     | -       | Transcriptional regulator, TetR family                     | Transcription                                    | 2.49E-03 | -2.08              |
| SAUSA300_2491     | -       | Delta-1-pyrroline-5-carboxylate dehydrogenase (EC 1.5.1.1) | Energy production and conversion                 | 1.37E-04 | -3.37              |
| SAUSA300_2492     | -       | O-acetyltransferase (cell wall biosynthesis) (EC 2.3.1.-)  | General function prediction only                 | 1.70E-07 | 12.39              |
| SAUSA300_2498     | crtN    | Dehydrosqualene desaturase (EC 1.3.99.-)                   | Secondary metabolites biosynthesis, transport    | 6.65E-11 | -13.84             |
| SAUSA300_2499     | crtM    | dehydrosqualene synthase (EC 2.5.1.-)                      | Lipid transport and metabolism                   | 2.85E-12 | -18.92             |
| SAUSA300_2500     | -       | HPNB PROTEIN                                               | Cell wall/membrane biogenesis                    | 7.64E-12 | -12.54             |
| SAUSA300_2501     | -       | Phytoene desaturase (EC 1.14.99.-)                         | Secondary metabolites biosynthesis, transport    | 1.20E-08 | -2.77              |
| SAUSA300_2502     | -       | Hypothetical protein                                       | ---                                              | 2.35E-11 | -53.38             |
| SAUSA300_2506     | isaA    | Hypothetical protein                                       | ---                                              | 3.05E-06 | -2.92              |
| SAUSA300_2507     | -       | Hypothetical membrane spanning protein                     | General function prediction only                 | 2.45E-09 | 5.71               |
| SAUSA300_2508     | -       | Hypothetical protein                                       | ---                                              | 1.34E-02 | 22.00              |
| SAUSA300_2510     | -       | Hypothetical protein                                       | ---                                              | 2.78E-03 | 2.89               |
| SAUSA300_2511     | -       | Hypothetical cytosolic protein                             | Function unknown                                 | 1.79E-04 | 14.79              |
| SAUSA300_2512     | -       | Glyoxalase family protein                                  | General function prediction only                 | 8.23E-10 | 10.12              |
| SAUSA300_2513     | -       | putative nucleoside-diphosphate-sugar epimerases           | Cell wall/membrane biogenesis                    | 6.81E-05 | 19.76              |
| SAUSA300_2514     | -       | Hypothetical protein                                       | Function unknown                                 | 3.73E-08 | 58.68              |
| SAUSA300_2515     | -       | Transcriptional regulator, TetR family                     | Transcription                                    | 1.34E-05 | 5.27               |
| SAUSA300_2516     | -       | Short chain dehydrogenase                                  | Lipid transport and metabolism                   | 1.45E-07 | 4.57               |
| SAUSA300_2517     | -       | 5-carboxyvanillic acid decarboxylase (EC 4.1.1.-)          | General function prediction only                 | 2.41E-06 | -2.40              |
| SAUSA300_2518     | -       | Esterase/Lipase (EC 3.1.-)                                 | General function prediction only                 | 2.04E-12 | -7.24              |
| SAUSA300_2519     | -       | Low-affinity zinc transport protein                        | General function prediction only                 | 1.06E-13 | 3.65               |
| SAUSA300_2520     | -       | Ferrous iron transport protein B                           | Inorganic ion transport and metabolism           | 2.91E-09 | 5.83               |
| SAUSA300_2521     | -       | Oxidoreductase (EC 1.1.1.-)                                | Posttranslational modification, protein turnover | 1.78E-08 | 41.36              |
| SAUSA300_2524     | -       | Hypothetical protein                                       | ---                                              | 4.08E-04 | -2.41              |
| SAUSA300_2525     | -       | Fructosamine kinase family protein                         | Carbohydrate transport and metabolism            | 2.35E-10 | -29.30             |
| SAUSA300_2526     | pyrD    | Dihydroorotate dehydrogenase (EC 1.3.3.1)                  | Nucleotide transport and metabolism              | 4.82E-04 | 2.27               |
| SAUSA300_2529     | -       | PhnB protein                                               | Function unknown                                 | 2.80E-07 | -2.24              |
| SAUSA300_2530     | -       | Transcriptional regulator, TetR family                     | Transcription                                    | 5.40E-03 | 2.37               |
| SAUSA300_2533     | panC    | Pantoate-beta-alanine ligase (EC 6.3.2.1)                  | Coenzyme transport and metabolism                | 2.03E-02 | 3.02               |

| probe set mapping   | synonym | description                                                                                            | NCBI COG                                         | p-value  | day one / inoculum |
|---------------------|---------|--------------------------------------------------------------------------------------------------------|--------------------------------------------------|----------|--------------------|
| SAUSA300_2534       | panB    | 3-methyl-2-oxobutanoate hydroxymethyltransferase (EC 2.3.1.16)                                         | Coenzyme transport and metabolism                | 8.64E-09 | 3.79               |
| SAUSA300_2535       | panE    | 2-dehydropantoate 2-reductase (EC 1.1.1.169)                                                           | Coenzyme transport and metabolism                | 1.19E-07 | 5.33               |
| SAUSA300_2539       | -       | 4-aminobutyrate aminotransferase (EC 2.6.1.19)                                                         | Amino acid transport and metabolism              | 5.21E-05 | 6.31               |
| SAUSA300_2543       | -       | Signal transduction protein TRAP                                                                       | General function prediction only                 | 2.04E-05 | -3.96              |
| SAUSA300_2546       | betB    | Betaine aldehyde dehydrogenase (EC 1.2.1.8)                                                            | Energy production and conversion                 | 3.94E-11 | -7.73              |
| SAUSA300_2549       | bccT    | Choline transport protein                                                                              | Cell wall/membrane biogenesis                    | 2.87E-06 | -3.88              |
| SAUSA300_2550       | nrdG    | Anaerobic ribonucleoside-triphosphate reductase activator                                              | Posttranslational modification, protein turnover | 1.61E-03 | -3.12              |
| SAUSA300_2551       | nrdD    | Anaerobic ribonucleoside-triphosphate reductase (EC 1.1.1.17)                                          | Nucleotide transport and metabolism              | 8.33E-03 | -2.53              |
| SAUSA300_2552       | -       | Hypothetical protein                                                                                   | Energy production and conversion                 | 2.04E-03 | 8.09               |
| SAUSA300_2555       | -       | Glutathione peroxidase (EC 1.11.1.9)                                                                   | Posttranslational modification, protein turnover | 6.68E-04 | 7.55               |
| SAUSA300_2558       | -       | Two-component sensor histidine kinase (EC 2.7.3.-)                                                     | Signal transduction mechanisms                   | 1.41E-06 | -2.06              |
| SAUSA300_2559       | -       | Two-component response regulator                                                                       | Signal transduction mechanisms                   | 1.08E-05 | -2.02              |
| SAUSA300_2561       | phoB    | Alkaline phosphatase (EC 3.1.3.1)                                                                      | Inorganic ion transport and metabolism           | 8.64E-09 | 17.23              |
| SAUSA300_2563       | -       | Transcriptional regulator, MarR family                                                                 | Transcription                                    | 9.49E-03 | -2.46              |
| SAUSA300_2571       | argR    | Arginine repressor, argR                                                                               | Transcription                                    | 7.81E-11 | 34.55              |
| SAUSA300_2573       | isaB    | Hypothetical protein                                                                                   | ---                                              | 5.04E-07 | -5.72              |
| SAUSA300_2574       | -       | Hypothetical exported protein                                                                          | ---                                              | 1.16E-05 | 14.76              |
| SAUSA300_2576       | -       | PTS system, mannose-specific IIB component (EC 2.7.1.3)                                                | Carbohydrate transport and metabolism            | 1.23E-07 | 12.55              |
| SAUSA300_2580       | -       | N-carbamoylsarcosine amidase (EC 3.5.1.59)                                                             | Secondary metabolites biosynthesis, transport    | 3.19E-07 | -2.25              |
| SAUSA300_2582       | -       | surface protein Pls                                                                                    | ---                                              | 2.83E-13 | -23.83             |
| SAUSA300_2583       | -       | Poly(Glycerol-phosphate) alpha-glucosyltransferase (EC 2.3.1.16)                                       | Cell wall/membrane biogenesis                    | 3.56E-11 | -2.48              |
| SAUSA300_2584       | -       | Protein translocase subunit secA                                                                       | Intracellular trafficking and secretion          | 3.39E-09 | -2.36              |
| SAUSA300_2585       | -       | Hypothetical cytosolic protein                                                                         | ---                                              | 4.18E-05 | 4.88               |
| SAUSA300_2587       | -       | Hypothetical protein                                                                                   | ---                                              | 1.22E-02 | 2.17               |
| SAUSA300_2589       | -       | Cell surface protein                                                                                   | ---                                              | 2.40E-02 | -2.14              |
| SAUSA300_2592       | -       | Hypothetical protein                                                                                   | ---                                              | 2.35E-10 | -30.33             |
| SAUSA300_2594       | msrA    | Peptide methionine sulfoxide reductase (EC 1.8.4.11)                                                   | Posttranslational modification, protein turnover | 2.08E-04 | 6.94               |
| SAUSA300_2596       | cap1C   | Phosphotyrosine-protein phosphatase (capsular polysaccharide biosynthesis)                             | Carbohydrate transport and metabolism            | 1.56E-03 | 17.63              |
| SAUSA300_2597       | cap1B   | Tyrosine-protein kinase (capsular polysaccharide biosynthesis)                                         | Cell cycle control, mitosis and meiosis          | 6.76E-07 | 9.09               |
| SAUSA300_2598       | cap1A   | Chain length regulator (capsular polysaccharide biosynthesis)                                          | Cell wall/membrane biogenesis                    | 5.14E-07 | 124.10             |
| SAUSA300_2599       | tetR    | Transcriptional regulator IcaR                                                                         | Transcription                                    | 5.38E-04 | -2.29              |
| SAUSA300_2600       | icaA    | N-acetylglucosaminyltransferase (EC 2.4.1.-)                                                           | ---                                              | 1.11E-11 | 95.95              |
| SAUSA300_2601       | icaB    | Polysaccharide deacetylase                                                                             | ---                                              | 9.16E-10 | 15.78              |
| SAUSA300_2603       | lip     | Lipase (EC 3.1.1.3)                                                                                    | General function prediction only                 | 3.03E-12 | -21.34             |
| SAUSA300_2605       | hisIE   | Phosphoribosyl-AMP cyclohydrolase (EC 3.5.4.19) / Phosphoribosyl-AMP lyase (EC 3.5.4.20)               | Amino acid transport and metabolism              | 4.89E-05 | 8.03               |
| SAUSA300_2606       | hisF    | Imidazole glycerol phosphate synthase, cyclase subunit (EC 2.3.1.22)                                   | Amino acid transport and metabolism              | 1.45E-08 | 15.72              |
| SAUSA300_2607       | hisA    | 1-(5-phosphoribosyl)-5-[(5-phosphoribosylamino)methyl]imidazole 4-carboxamide synthetase (EC 2.3.1.22) | Amino acid transport and metabolism              | 1.18E-05 | 6.75               |
| SAUSA300_2608       | hisH    | Imidazole glycerol phosphate synthase, glutamine amidotransferase subunit (EC 2.3.1.22)                | Amino acid transport and metabolism              | 6.96E-06 | 8.01               |
| SAUSA300_2609       | hisB    | Imidazoleglycerol-phosphate dehydratase (EC 4.2.1.19)                                                  | Amino acid transport and metabolism              | 1.53E-09 | 32.55              |
| SAUSA300_2610       | hisC    | Histidinol-phosphate aminotransferase (EC 2.6.1.9)                                                     | Amino acid transport and metabolism              | 6.70E-12 | 61.05              |
| SAUSA300_2611       | hisD    | Histidinol dehydrogenase (EC 1.1.1.23)                                                                 | Amino acid transport and metabolism              | 1.76E-04 | 15.93              |
| SAUSA300_2612       | hisG    | ATP phosphoribosyltransferase (EC 2.4.2.17)                                                            | Amino acid transport and metabolism              | 4.50E-05 | 8.51               |
| SAUSA300_2613       | hisZ    | Hypothetical cytosolic protein                                                                         | Amino acid transport and metabolism              | 6.81E-03 | 2.04               |
| SAUSA300_2615       | -       | Ribosomal-protein-alanine acetyltransferase (EC 2.3.1.128)                                             | Translation                                      | 2.81E-02 | 5.79               |
| SAUSA300_2618       | -       | Hypothetical protein                                                                                   | Function unknown                                 | 1.47E-08 | 13.91              |
| SAUSA300_2619       | -       | Hypothetical cytosolic protein                                                                         | Function unknown                                 | 4.62E-10 | 18.97              |
| SAUSA300_2620       | -       | Hypothetical exported protein                                                                          | Function unknown                                 | 3.84E-13 | -4.06              |
| SAUSA300_2622       | -       | Rhodanese-related sulfurtransferases                                                                   | General function prediction only                 | 6.99E-07 | 14.14              |
| SAUSA300_2623       | pcp     | Pyroldidone-carboxylate peptidase (EC 3.4.19.3)                                                        | Posttranslational modification, protein turnover | 2.44E-12 | 10.56              |
| SAUSA300_2624       | -       | Hypothetical protein                                                                                   | ---                                              | 4.63E-06 | 2.32               |
| SAUSA300_2625       | -       | Transcriptional regulator, PadR family                                                                 | Transcription                                    | 3.34E-11 | 12.21              |
| SAUSA300_2630       | nixA    | High-affinity nickel transport protein                                                                 | Inorganic ion transport and metabolism           | 3.02E-08 | -3.73              |
| SAUSA300_2631       | -       | Hypothetical protein                                                                                   | Secondary metabolites biosynthesis, transport    | 8.80E-05 | 6.10               |
| SAUSA300_2632       | -       | Hypothetical membrane spanning protein                                                                 | Function unknown                                 | 2.79E-06 | -8.38              |
| SAUSA300_2633       | -       | Bacitracin transport ATP-binding protein ytsC                                                          | Defense mechanisms/Virulence                     | 7.46E-07 | 41.80              |
| SAUSA300_2634       | -       | ABC transporter permease protein                                                                       | Secondary metabolites biosynthesis, transport    | 2.06E-05 | 66.60              |
| SAUSA300_2637       | -       | Hypothetical protein                                                                                   | ---                                              | 7.20E-04 | 2.42               |
| SAUSA300_2639       | -       | Cold shock protein                                                                                     | Transcription                                    | 7.96E-08 | -14.25             |
| SAUSA300_2648       | rpmH    | LSU ribosomal protein L34P                                                                             | ---                                              | 4.29E-09 | -2.30              |
| SAUSA300_pUSA020001 | -       | TETRACYCLINE RESISTANCE PROTEIN TETA(L)/TETA(M)                                                        | ---                                              | 1.43E-13 | 204.47             |
| SAUSA300_pUSA020002 | -       | Plasmid recombination protein, Mob family                                                              | ---                                              | 1.17E-11 | 118.17             |
| SAUSA300_pUSA020003 | -       | Replication initiation protein, RepA family                                                            | Replication, recombination and repair            | 1.13E-11 | 60.50              |
| SAUSA300_pUSA030001 | repA    | Replication initiator protein                                                                          | ---                                              | 2.02E-06 | 511.47             |
| SAUSA300_pUSA030003 | ileS    | Isoleucyl-tRNA synthetase, mupirocin resistant (EC 6.1.1.6)                                            | Translation                                      | 5.71E-12 | 1392.85            |
| SAUSA300_pUSA030006 | -       | Replication and maintenance protein                                                                    | ---                                              | 3.70E-11 | 1560.01            |
| SAUSA300_pUSA030007 | ermC    | rRNA adenine N-6-methyltransferase (EC 2.1.1.48)                                                       | ---                                              | 7.35E-07 | 98.15              |
| SAUSA300_pUSA030009 | -       | Hypothetical protein                                                                                   | ---                                              | 3.82E-04 | 44.93              |
| SAUSA300_pUSA030010 | traA    | Hypothetical protein                                                                                   | ---                                              | 3.07E-13 | 468.31             |
| SAUSA300_pUSA030011 | traB    | Hypothetical protein                                                                                   | ---                                              | 3.05E-14 | 92.86              |
| SAUSA300_pUSA030013 | traD    | Hypothetical protein                                                                                   | ---                                              | 1.64E-10 | 592.59             |
| SAUSA300_pUSA030014 | traE    | TRSE PROTEIN                                                                                           | Intracellular trafficking and secretion          | 2.10E-11 | 37.45              |
| SAUSA300_pUSA030015 | traF    | Hypothetical protein                                                                                   | ---                                              | 2.52E-08 | 157.15             |
| SAUSA300_pUSA030016 | traG    | Secretory antigen precursor SsaA                                                                       | ---                                              | 1.57E-14 | 373.31             |
| SAUSA300_pUSA030017 | traH    | Hypothetical protein                                                                                   | ---                                              | 2.41E-06 | 214.40             |
| SAUSA300_pUSA030018 | traI    | DNA topoisomerase III (EC 5.99.1.2)                                                                    | Replication, recombination and repair            | 2.55E-15 | 300.34             |
| SAUSA300_pUSA030019 | traJ    | Hypothetical protein                                                                                   | ---                                              | 3.13E-08 | 194.77             |
| SAUSA300_pUSA030020 | traK    | TraG/TraD family                                                                                       | Intracellular trafficking and secretion          | 1.26E-11 | 71.06              |
| SAUSA300_pUSA030021 | traL    | Hypothetical protein                                                                                   | ---                                              | 1.71E-09 | 183.92             |
| SAUSA300_pUSA030022 | traM    | Hypothetical protein                                                                                   | Replication, recombination and repair            | 1.73E-05 | 165.23             |
| SAUSA300_pUSA030023 | traO    | Hypothetical protein                                                                                   | ---                                              | 2.10E-05 | 965.74             |

| probe set mapping       | synonym | description                                     | NCBI COG                              | p-value  | day one / inoculum |
|-------------------------|---------|-------------------------------------------------|---------------------------------------|----------|--------------------|
| SAUSA300_pUSA030024     | -       | Transposase                                     | Replication, recombination and repair | 1.98E-11 | 1034.30            |
| SAUSA300_pUSA030025     | -       | Hypothetical protein                            | ---                                   | 4.84E-10 | 358.06             |
| SAUSA300_pUSA030026     | -       | Hypothetical protein                            | Function unknown                      | 1.83E-06 | 49.90              |
| SAUSA300_pUSA030027     | -       | Hypothetical protein                            | ---                                   | 3.53E-14 | 62.75              |
| SAUSA300_pUSA030028     | -       | DNA integration/recombination/inversion protein | Replication, recombination and repair | 1.85E-08 | 18.18              |
| SAUSA300_pUSA030029     | -       | Hypothetical protein                            | ---                                   | 4.45E-11 | 215.73             |
| SAUSA300_pUSA030030     | -       | Hypothetical protein                            | ---                                   | 3.77E-09 | 81.47              |
| SAUSA300_pUSA030031     | -       | LtrC                                            | ---                                   | 1.45E-08 | 221.20             |
| SAUSA300_pUSA030032     | nes     | Conjugal transfer protein traA                  | Replication, recombination and repair | 9.96E-10 | 922.68             |
| SAUSA300_pUSA030034     | -       | Hypothetical protein                            | ---                                   | 6.95E-11 | 277.50             |
| SAUSA300_pUSA030035     | -       | Hypothetical protein                            | ---                                   | 5.01E-13 | 464.23             |
| SAUSA300_pUSA030036     | -       | Hypothetical protein                            | ---                                   | 2.27E-12 | 1730.34            |
| SAUSA3000050-0052.m at  | -       | psuedogene                                      | ---                                   | 3.29E-07 | 28.44              |
| SAUSA3000086-0088.rc at | -       | psuedogene                                      | ---                                   | 1.14E-04 | 3.06               |
| SAUSA3000148-0151.m at  | -       | psuedogene                                      | ---                                   | 9.08E-03 | 3.14               |
| SAUSA3000154-0156.m at  | -       | psuedogene                                      | ---                                   | 1.75E-10 | 57.40              |
| SAUSA3000154-0156.rc at | -       | psuedogene                                      | ---                                   | 1.97E-10 | 28.73              |
| SAUSA3000411-0413.m at  | -       | psuedogene                                      | ---                                   | 7.19E-06 | 7.12               |
| SAUSA3000411-0413.rc at | -       | psuedogene                                      | ---                                   | 8.79E-04 | 2.51               |
| SAUSA3000737-0739.rc at | -       | psuedogene                                      | ---                                   | 4.99E-04 | 2.16               |
| SAUSA3001438-1440.m at  | -       | psuedogene                                      | ---                                   | 6.67E-05 | 2.10               |
| SAUSA3001708-1710.m at  | -       | psuedogene                                      | ---                                   | 8.70E-07 | 36.52              |
| SAUSA3001708-1710.rc at | -       | psuedogene                                      | ---                                   | 1.04E-03 | 11.71              |
| SAUSA3001726-1728.m at  | -       | psuedogene                                      | ---                                   | 5.44E-09 | 33.07              |
| SAUSA3001726-1728.rc at | -       | psuedogene                                      | ---                                   | 8.31E-09 | 41.49              |
| SAUSA3001747-1749.m at  | -       | psuedogene                                      | ---                                   | 6.06E-04 | 2.87               |
| SAUSA3001747-1749.rc at | -       | psuedogene                                      | ---                                   | 7.98E-05 | 4.41               |
| SAUSA3001916-1918.m at  | -       | psuedogene                                      | ---                                   | 1.16E-04 | 3.40               |
| SAUSA3001916-1918.rc at | -       | psuedogene                                      | ---                                   | 7.24E-07 | 30.13              |
| SAUSA3002169-2171.m at  | -       | psuedogene                                      | ---                                   | 2.81E-12 | 17.90              |
| SAUSA3002169-2171.rc at | -       | psuedogene                                      | ---                                   | 2.28E-13 | 8.95               |
| SAUSA3002426-2428.m at  | -       | psuedogene                                      | ---                                   | 5.21E-11 | 23.65              |
| SAUSA3002426-2428.rc at | -       | psuedogene                                      | ---                                   | 6.35E-07 | 12.06              |
